# Supplementary material
Source: PubMed Central journal article supplement (PMC7296830)
Supplement: NIHMS1591898-supplement-Supplementary_file_2.pdf [file NIHMS1591898-supplement-Supplementary_file_2.pdf]

## Supporting Information 2

### Elucidation of Catalytic Strategies of Small Nucleolytic Ribozymes from Comparative Analysis of Active Sites

Daniel D. Seith,<sup>1,¶</sup> Jamie L. Bingaman,<sup>1,¶</sup> Andrew J. Veenis,<sup>1</sup> Aileen C. Button,<sup>1,2</sup> Philip C. Bevilacqua<sup>1,3,\*</sup>

<sup>1</sup>Department of Chemistry and Center for RNA Molecular Biology, The Pennsylvania State University, University Park, Pennsylvania 16802

<sup>2</sup>Department of Biochemistry, The University of Vermont, Burlington, Vermont 05405

<sup>3</sup>Department of Biochemistry and Molecular Biology, The Pennsylvania State University, University Park, Pennsylvania 16802

<sup>¶</sup>These two authors contributed equally to this work.

\*Corresponding author: pcb5@psu.edu

## Contents

### Supporting Methods (Scripts)

|                                                                     |     |
|---------------------------------------------------------------------|-----|
| I. $\gamma$ , $\beta$ , and $\delta$ Scissile Phosphate Plugin..... | S3  |
| II. $\alpha$ Plugin.....                                            | S20 |
| III. $\gamma$ , $\beta$ , and $\delta$ All-Phosphates Plugin. ....  | S35 |
| IV. Scissile Phosphate Downstream Processing Script.....            | S62 |
| V. All Phosphate Downstream Processing Script.....                  | S86 |

## Supporting Methods (Scripts)

### I. $\gamma$ , $\beta$ , and $\delta$ Scissile Phosphate Plugin

```
from Tkinter import *
from pymol import cmd, stored
import math
import numpy as np

def __init__(self):
    self.menuBar.addmenuitem('Plugin', 'command',
                              'Scissile Phosphate Contacts',
                              label='Scissile Phosphate Contacts',
                              command=lambda s=self: getInfo(s))

def getInfo(app):
    root = Tk()

    def get_data():
        resn_name = e2.get()
        resn_name = resn_name.split()
        parent_mol = e1.get()
        atom_name = e3.get()

        # Close GUI window
        root.destroy()
        remove_additional_conformations()
        getDist(atom_name, resn_name[-1], parent_mol)

    l1 = Label(root, text="Selection Name:")
    l1.grid(row=1, column=0)

    e1 = Entry(root)
    e1.grid(row=1, column=1)
    e1.delete(0, END)
    e1.insert(0, "1p1")

    l2 = Label(root, text="Resin Name:")
    l2.grid(row=2, column=0)

    e2 = Entry(root)
    e2.grid(row=2, column=1)
    e2.delete(0, END)
    e2.insert(0, "2AD")
```

```

l3 = Label(root, text="Atom Name:")
l3.grid(row=3, column=0)

e3 = Entry(root)
e3.grid(row=3, column=1)
e3.delete(0, END)
e3.insert(0, "N")

B1 = Button(root, text="Finish", command=get_data)
B1.grid(columnspan=2)

mainloop()

```

```
cmd.extend('getInfo', getInfo)
```

```
def remove_additional_conformations():
```

```

    stored.alt_b = []
    cmd.iterate("alt B", "stored.alt_b.append(index)")
    alt_b = stored.alt_b
    if len(alt_b) > 0:
        cmd.remove("alt B")
        print("Atoms included in alternative conformation B were removed.")

```

```

    stored.alt_all = []
    cmd.iterate("all", "stored.alt_all.append(alt)")
    alt_all = stored.alt_all

```

```

    alt_all_filtered = []
    for a in range(len(alt_all)):
        if len(alt_all[a]) != 0:
            alt_all_filtered.append(alt_all[a])

```

```

    additional_conformations = False
    if len(alt_all_filtered) > 0:
        for a in range(len(alt_all_filtered)):
            if alt_all_filtered[a] != 'A':
                additional_conformations = True
    if additional_conformations:
        print("ERROR: Additional conformations are present.")

```

```
def getCAtwo(searchAtom, search_resn):
```

```
adenine_atoms = ["N1", "C2", "N3", "C4", "C5", "C6", "N6", "N7", "C8", "N9"]
adenine_na_one = ["C2", "N3", "C4", "C5", "C6", "C5", "C6", "C8", "N9", "C8"]
adenine_na_two = ["C6", "N1", "C2", "N3", "C4", "N1", "N1", "C5", "N7", "C4"]
```

```
# purine is referred to in PyMOL as P5P
```

```
purine_atoms = ["N1", "C2", "N3", "C4", "C5", "C6", "N7", "C8", "N9"]
purine_na_one = ["C2", "N3", "C4", "C5", "C6", "C5", "C8", "N9", "C8"]
purine_na_two = ["C6", "N1", "C2", "N3", "C4", "N1", "C5", "N7", "C4"]
```

```
# one_deaza_adenine is referred to in PyMOL as 1DP
```

```
one_deaza_adenine_atoms = ["C1", "C2", "N3", "C4", "C5", "C6", "N6", "N7", "C8", "N9"]
one_deaza_adenine_na_one = ["C2", "N3", "C4", "C5", "C6", "C5", "C6", "C8", "N9", "C8"]
one_deaza_adenine_na_two = ["C6", "C1", "C2", "N3", "C4", "C1", "C1", "C5", "N7", "C4"]
```

```
cytosine_atoms = ["N1", "C2", "O2", "N3", "C4", "N4", "C5", "C6"]
cytosine_na_one = ["C2", "N1", "C2", "C4", "C5", "C4", "C6", "N1"]
cytosine_na_two = ["C6", "N3", "N1", "C2", "N3", "C5", "C4", "C5"]
```

```
inosine_atoms = ["N1", "C2", "N3", "C4", "C5", "C6", "O6", "N7", "C8", "N9"]
inosine_na_one = ["C2", "N3", "C4", "C5", "C6", "C5", "C6", "C8", "N9", "C8"]
inosine_na_two = ["C6", "N1", "C2", "N3", "C4", "N1", "N1", "C5", "N7", "C4"]
```

```
guanine_atoms = ["N1", "C2", "N2", "N3", "C4", "C5", "C6", "O6", "N7", "C8", "N9"]
guanine_na_one = ["C2", "N3", "C2", "C4", "C5", "C6", "C5", "C6", "C8", "N9", "C8"]
guanine_na_two = ["C6", "N1", "N1", "C2", "N3", "C4", "N1", "N1", "C5", "N7", "C4"]
```

```
# six_deoxy_guanine is referred to in PyMOL as MTU
```

```
six_deoxy_guanine_atoms = ["N1", "C2", "N2", "N3", "C4", "C5", "C6", "N7", "C8", "N9"]
six_deoxy_guanine_na_one = ["C2", "N3", "C2", "C4", "C5", "C6", "C5", "C8", "N9", "C8"]
six_deoxy_guanine_na_two = ["C6", "N1", "N1", "C2", "N3", "C4", "N1", "C5", "N7", "C4"]
```

```
six_amino_guanine_atoms = ["N1", "C2", "N2", "N3", "C4", "C5", "C6", "N6", "N7", "C8",
"N9"]
six_amino_guanine_na_one = ["C2", "N3", "C2", "C4", "C5", "C6", "C5", "C6", "C8", "N9",
"C8"]
six_amino_guanine_na_two = ["C6", "N1", "N1", "C2", "N3", "C4", "N1", "N1", "C5", "N7",
"C4"]
```

```
uracil_atoms = ["N1", "C2", "O2", "N3", "C4", "O4", "C5", "C6"]
uracil_na_one = ["C2", "N1", "C2", "C4", "C5", "C4", "C6", "C5"]
uracil_na_two = ["C6", "N3", "N1", "C2", "N3", "C5", "C4", "C5"]
```

```
na_one_name = "N/A"
na_two_name = "N/A"
```

```
if "C" in searchAtom:
```

```

return na_one_name, na_two_name

if search_resn == "A":
    for n in range(0, len(adenine_atoms)):
        if searchAtom == adenine_atoms[n]:
            na_one_name = adenine_na_one[n]
            na_two_name = adenine_na_two[n]
            break

if search_resn == "P5P":
    for n in range(0, len(purine_atoms)):
        if searchAtom == purine_atoms[n]:
            na_one_name = purine_na_one[n]
            na_two_name = purine_na_two[n]
            break

if search_resn == "1DP":
    for n in range(0, len(one_deaza_adenine_atoms)):
        if searchAtom == one_deaza_adenine_atoms[n]:
            na_one_name = one_deaza_adenine_na_one[n]
            na_two_name = one_deaza_adenine_na_two[n]
            break

if search_resn == "I":
    for n in range(0, len(inosine_atoms)):
        if searchAtom == inosine_atoms[n]:
            na_one_name = inosine_na_one[n]
            na_two_name = inosine_na_two[n]
            break

if search_resn == "G":
    for n in range(0, len(guanine_atoms)):
        if searchAtom == guanine_atoms[n]:
            na_one_name = guanine_na_one[n]
            na_two_name = guanine_na_two[n]
            break

if search_resn == "MTU":
    for n in range(0, len(six_deoxy_guanine_atoms)):
        if searchAtom == six_deoxy_guanine_atoms[n]:
            na_one_name = six_deoxy_guanine_na_one[n]
            na_two_name = six_deoxy_guanine_na_two[n]
            break

if search_resn == "N6G":
    for n in range(0, len(six_amino_guanine_atoms)):

```

```

    if searchAtom == six_amino_guanine_atoms[n]:
        na_one_name = six_amino_guanine_na_one[n]
        na_two_name = six_amino_guanine_na_two[n]
        break

if search_resn == "C":
    for n in range(0, len(cytosine_atoms)):
        if searchAtom == cytosine_atoms[n]:
            na_one_name = cytosine_na_one[n]
            na_two_name = cytosine_na_two[n]
            break

if search_resn == "U":
    for n in range(0, len(uracil_atoms)):
        if searchAtom == uracil_atoms[n]:
            na_one_name = uracil_na_one[n]
            na_two_name = uracil_na_two[n]
            break

return na_one_name, na_two_name

def getCAtwo_CVC(searchAtom):
    cytosine_atoms = ["N9", "C4", "O01", "N01", "C02", "N02", "C01", "C8"]
    cytosine_na_one = ["C4", "N01", "C4", "C02", "C01", "C02", "C8", "N9"]
    cytosine_na_two = ["C8", "N9", "N9", "C4", "N01", "C01", "C02", "C01"]

    na_one_name = "N/A"
    na_two_name = "N/A"

    for n in range(0, len(cytosine_atoms)):
        if searchAtom == cytosine_atoms[n]:
            na_one_name = cytosine_na_one[n]
            na_two_name = cytosine_na_two[n]
            break

    return na_one_name, na_two_name

def distance(point_one, point_two):
    dist = math.sqrt((point_two[0] - point_one[0])** 2 + (point_two[1] - point_one[1])** 2 + (
        point_two[2] - point_one[2])** 2)
    return dist

def cross_product(point_one, point_two):

```

```

one_cross_two = [point_one[1] * point_two[2] - point_one[2] * point_two[1],
                 point_one[2] * point_two[0] - point_one[0] * point_two[2],
                 point_one[0] * point_two[1] - point_one[1] * point_two[0]]

return one_cross_two

def vector(point_one, point_two):
    output_vector = [point_two[0] - point_one[0],
                    point_two[1] - point_one[1],
                    point_two[2] - point_one[2]]
    return output_vector

def plane(P1, P2, P3):
    v1 = vector(P1, P2)
    v2 = vector(P2, P3)
    v1_v2 = cross_product(v1, v2)

    rhs = 0
    for n in range(0, len(P)):
        rhs += v1[n] * v1_v2[n]

    plane_equation = [v1_v2[0], v1_v2[1], v1_v2[2], rhs]

    return plane_equation

def dot_product(v1, v2):
    product = v1[0] * v2[0] + v1[1] * v2[1] + v1[2] * v2[2]
    return product

def get_angle_from_coords(P1, P2, P3):
    v1 = vector(P1, P2)
    v2 = vector(P2, P3)

    # Prevent dividing by zero
    if distance(P1, P2) * distance(P2, P3) == 0:
        return 0

    angle_out = math.acos((dot_product(v1, v2)) / (distance(P1, P2) * distance(P2, P3)))
    angle_out = 180 - angle_out * 180.0 / math.pi

    return angle_out

```



```

def get_angle_from_vectors(v1, v2):
    # Prevent dividing by zero
    if vector_length(v1) * vector_length(v2) == 0:
        return 0
    var = math.fabs((dot_product(v1, v2)) / (vector_length(v1) * vector_length(v2)))

    # Prevent inverse cosine domain errors
    if var > 1.0:
        var = 2.0 - var
    angle_out = math.acos(var)

    angle_out = 180 - angle_out * 180.0 / math.pi
    return angle_out

def vector_length(v1):
    # The purpose of this function is to extract the length of a 3-coordinate vector
    vector_len = [x ** 2 for x in v1]
    vector_len = math.sqrt(sum(vector_len))
    return vector_len

def get_angle_between_normal_vectors(h1, p1, p2, p3):
    # The purpose of this function is to take in four points as arguments and determine the angle
    # between the
    # normal vectors of the planes created by points h1, p1, p2 and p1, p2, p3.

    # Transform each pair of points to 3 vectors
    vector_h1_p1 = vector(h1, p1)
    vector_p1_p2 = vector(p1, p2)
    vector_p1_p3 = vector(p1, p3)

    # Get the cross-product of the two pairs of vectors
    cross_p1 = cross_product(vector_h1_p1, vector_p1_p2)
    cross_p2 = cross_product(vector_p1_p2, vector_p1_p3)

    # Use the two cross products to find the resulting angle
    angle_ab = get_angle_from_vectors(cross_p1, cross_p2)

    # Treat angles near 180 and near 0 as the same (177 would be the same as 3)
    if angle_ab > 90:
        angle_ab = 180 - angle_ab
    return angle_ab

```

```

def direction(P1, P2):
    eqn = [P2 - P1 for P1, P2 in zip(P1, P2)]
    return eqn

def find_length(fictional_proton_direction, over_all_distance):
    length = math.sqrt(
        over_all_distance ** 2 / (fictional_proton_direction[0] ** 2 + fictional_proton_direction[1]
** 2 +
            fictional_proton_direction[2] ** 2))
    return length

def extend(point, line_direction, length):
    end_point = np.array([point + length * line_direction for point, line_direction in zip(point,
line_direction)])
    return end_point

def replace_mod_nb(nb_name):
    # Create a list of modified NB names, where the left reflects the old and the right reflects the
new
    modlist = [["2AD", "OMC", "OMU", "A2M", "DA", "DC", "CVC", "DU", "AP3", "GX1",
"DG", "AVC", "3DA", "3AD"],
        ["A", "C", "U", "A", "A", "C", "C", "U", "A", "G", "G", "A", "A", "A"]]
    for n in range(0, len(modlist[0])):
        if nb_name == modlist[0][n]:
            nb_name = modlist[1][n]

    return nb_name

def getAngle(parent_string_array, parent_index_array, contact_string_array,
contact_index_array,
        aoi_atom_name, aoi_resn_name, aoi_index, ca_atom_name, ca_resn_name,
ca_resi_number,
        ca_chain_letter, nucleotide_list):
    # Assign default values for variables
    angle = 0
    ca_prot_atom = "H0"
    ca_prot_coords = [0, 0, 0]
    ca_prot_resn = ["Z"]

    # Replace modified nucleobase name with un-modified name
    ca_resn_name_modded = replace_mod_nb(ca_resn_name)

```

```

# Returns an angle of 0 for atoms that belong to residues that are not listed in the list of
nucleotides
if ca_resn_name_modded not in nucleotide_list:
    print("NOTE. An angle of 0 was returned for the following atom: CA " + ca_atom_name +
" resn " + ca_resn_name
        + " resi " + ca_resi_number
        + " chain " + ca_chain_letter)
    return 0

# Get the index and x, y, z coordinates for each atom
ca_index = getIndex(contact_string_array, contact_index_array, ca_atom_name,
ca_resn_name, ca_resi_number,
                    ca_chain_letter)
ca_coords = np.array(cmd.get_coords("index " + str(ca_index)))
ca_coords = [x for x in ca_coords[0]]

aoi_coords = np.array(cmd.get_coords("index " + str(aoi_index)))
aoi_coords = [x for x in aoi_coords[0]]

# Return 0 if the CA is the AOI
if ca_index == aoi_index:
    return 0

# Handle primary amines separately because they have two protons
primary_amine_list = [{"N2", "N6", "N4"},
                      ["G", "A", "C"]]

for x in range(0, len(primary_amine_list[1])):
    if ca_resn_name_modded == primary_amine_list[1][x]:
        primary_amine_list[1][x] = ca_resn_name
        break

# Assume the contact atom does not already have a proton
proton_available = False

# Find all atoms within 8 A of search_name
stored.adjacent_atom_string = []
stored.adjacent_atom_index = []
cmd.iterate("all within 8 of index " + str(aoi_index),
            "stored.adjacent_atom_string.append((resi, name, resn, b, chain))")
cmd.iterate("all within 8 of index " + str(aoi_index),
            "stored.adjacent_atom_index.append((index))")

adjacent_string_array = np.array(stored.adjacent_atom_string)
adjacent_index_array = np.array(stored.adjacent_atom_index, dtype=np.int32)

```

```

# Define the adjacent contact atom names
na_1_atom_name, na_2_atom_name = getCAtwo(ca_atom_name, ca_resn_name_modded)

# Define the adjacent contact atom names of CVC
if ca_resn_name == "CVC":
    na_1_atom_name, na_2_atom_name = getCAtwo_CVC(ca_atom_name)

# Notifies the user if either of the atoms adjacent to the CA could not be identified
if na_1_atom_name == "N/A" or na_2_atom_name == "N/A":
    print("ERROR. One or both of the atoms adjacent to the CA could not be identified.")

# Get indices and coordinates for the two adjacent contact atoms
na_1_index = getIndex(adjacent_string_array, adjacent_index_array, na_1_atom_name,
ca_resn_name, ca_resi_number,
                    ca_chain_letter)
na_1_coords = np.array(cmd.get_coords("index " + str(na_1_index)))
na_1_coords = [x for x in na_1_coords[0]]

na_2_index = getIndex(adjacent_string_array, adjacent_index_array, na_2_atom_name,
ca_resn_name, ca_resi_number,
                    ca_chain_letter)
na_2_coords = np.array(cmd.get_coords("index " + str(na_2_index)))
na_2_coords = [x for x in na_2_coords[0]]

# If getIndex can't find the atom, return an angle of -1
if ca_index < 0 or na_1_index < 0 or na_2_index < 0:
    print("ERROR. A contact atom or one of its adjacent atoms was assigned an angle of -1.")
    print(ca_atom_name + '\t' + ca_resn_name)
    return -1

# finds the indices of the amine protons (if any)
stored.amine_proton_index = []
cmd.iterate(
    "elem H and resi " + ca_resi_number + " and chain " + ca_chain_letter + " within 1.1 of
index " +
    str(ca_index), "stored.amine_proton_index.append((index))")
ca_proton_index_list = stored.amine_proton_index

# Get the list of protons for the contact atom (Ex: the N2G has 2 protons)
for primary_amine_name, primary_amine_resn in zip(primary_amine_list[0],
primary_amine_list[1]):
    if ca_atom_name == primary_amine_name and ca_resn_name == primary_amine_resn:

        proton_available = True

# ensures that the plugin identifies only 2 protons

```

```

if len(ca_proton_index_list) != 2:
    print("ERROR. The number of protons found for a primary amine is not 2.")
    return -1

# Declare a list to hold all potential angles
ca_angle_list = []

# Iterate through each proton name and append the contact angle to a list
for index in ca_proton_index_list:
    ca_proton_coords = np.array(cmd.get_coords("index " + str(index)))
    ca_proton_coords = [x for x in ca_proton_coords[0]]
    ca_angle_list.append(get_angle_from_coords(aoi_coords, ca_proton_coords,
ca_coords))

if proton_available:
    # Calculate the angle formed between the normal vectors of the prot, ca1, ca2 and ca1, ca2,
ca3
    normal_angle = get_angle_between_normal_vectors(ca_proton_coords, ca_coords,
na_1_coords, na_2_coords)

    # If the geometry is without error, calculate the angle
    if normal_angle < 5:
        # If the atom has more existing protons, use the proton with the most ideal geometry
        ca_angle_list = [math.fabs(180 - x) for x in ca_angle_list]
        angle = 180 - min(ca_angle_list)
        angle = round(angle, 2)
        return angle
    else:
        print("Residue number " + ca_resi_number + " on chain " + ca_chain_letter + " is non-
planar.")
        return -1

if not proton_available:
    midpoint_direction = direction(na_2_coords, na_1_coords)
    midpoint_coords = extend(na_2_coords, midpoint_direction, 0.5)

    fictional_proton_direction = direction(midpoint_coords, ca_coords)
    midpoint_ca_distance = distance(midpoint_coords, ca_coords)
    over_all_distance = midpoint_ca_distance + 1
    midpoint_to_proton_factor = find_length(fictional_proton_direction, over_all_distance)
    fictional_proton_coords = list(extend(midpoint_coords, fictional_proton_direction,
midpoint_to_proton_factor))
    fictional_proton_coords = [round(x, 4) for x in fictional_proton_coords]

    angle = get_angle_from_coords(aoi_coords, fictional_proton_coords, ca_coords)
    angle = round(angle, 2)

```

```
return angle
```

```
"""
```

The purpose of `getIndex` is to receive two arrays and two strings. One array will contain a list of indices while the other will contain a list of atom names and residue names. This can be used to find the index of atoms in the -1 and +1 bases as well as the index of atoms identified by the "select all within 8" statement.

```
"""
```

```
def getIndex(targetStringArray, targetIndexArray, searchName, searchResn,
search_residue_number, search_chain_letter):
    # Give target_index a default value
    target_index = -1
    if "aoi" not in search_residue_number and search_chain_letter != "Z":
        # Find the index of the target atom
        for n in range(len(targetIndexArray)):
            if targetStringArray[n][1] == searchName and targetStringArray[n][2] == searchResn
and \
                targetStringArray[n][0] == search_residue_number and targetStringArray[n][
4] == search_chain_letter:
                    target_index = targetIndexArray[n]
                    break
    elif search_chain_letter == "Z":
        # Find the index of the target atom
        for n in range(len(targetIndexArray)):
            if targetStringArray[n][1] == searchName and targetStringArray[n][2] == searchResn
and \
                targetStringArray[n][0] == search_residue_number:
                    target_index = targetIndexArray[n]
                    break
    else:
        # Find the index of the aoi
        for n in range(len(targetIndexArray)):
            if targetStringArray[n][1] == searchName and targetStringArray[n][2] == searchResn:
                target_index = targetIndexArray[n]
                break

    return target_index
```

```
def getDist(search_name, searchResn, parentMol):
    # Give AOI_Index a default value
    aoi_index = -1
```

```

# Add protons to all possible atoms so their orientation can be determined by get_angle
cmd.h_add("all")

# Find the PDBID of the structure
cmd.select("PDBID", "index 1")
stored.pdb = ""
cmd.iterate("PDBID", "stored.pdb = model")
pdb = str(stored.pdb)

# Initialize the array to hold the index, name, resi and b-factor of the target molecules
stored.target = []
stored.targetIndex = []
cmd.iterate(parentMol, "stored.target.append((resi, name, resn, chain, b))")
cmd.iterate(parentMol, "stored.targetIndex.append((index))")
parent_string_array = np.array(stored.target)
parent_index_array = np.array(stored.targetIndex, dtype=np.int32)

aoi_index = getIndex(parent_string_array, parent_index_array, search_name, searchResn,
"aoi", "a")

if aoi_index == -1:
    print("ERROR. AOI index could not be found.")
    return -1

# Checks for potential modified nucleotides that don't match those listed in this plugin
# accepts water (HOH) as an "accepted nucleotide"
cmd.select("Target_Contacts", "all within 8 of index " + str(aoi_index))

stored.nearby_residues = []
cmd.iterate("Target_Contacts", "stored.nearby_residues.append(resn)")

nearby_resn_list = np.array(stored.nearby_residues)
nucleotide_list = ["A", "G", "C", "U", "2AD", "OMC", "OMU", "A2M", "DA", "DC", "CVC",
"HOH", "DU", "MG", "MN", "TB",
"NA", "ZN", "AP3", "GX1", "DG", "IRI", "IR", "NCO", "CO", "TL", "BA", "SR",
"AVC", "1DP", "I",
"MTU", "N6G", "3DA", "3AD", "P5P"]
unlisted_nucleotide = []

for n in range(len(nearby_resn_list)):
    if nearby_resn_list[n] not in nucleotide_list:
        if nearby_resn_list[n] not in unlisted_nucleotide:
            print("NOTE. " + nearby_resn_list[n] + " is not listed as a modified nucleotide in this
plugin.")
            unlisted_nucleotide.append(nearby_resn_list[n])

```

```

# Find contacts within 5 A of aoi_index
cmd.select("Target_Contacts", "all within 5 of index " + str(aoi_index))

stored.atom_string = []
stored.atom_index = []
cmd.iterate("Target_Contacts", "stored.atom_string.append((resi, name, resn, b, chain))")
cmd.iterate("Target_Contacts", "stored.atom_index.append((index))")

contact_string_array = np.array(stored.atom_string)
contact_index_array = np.array(stored.atom_index, dtype=np.int32)

# Give the chain a default value if one is not already assigned
# Deletes metal ions from the list
metal_remove = False
metal_index_remove = []
for n in range(len(contact_string_array)):
    if len(contact_string_array[n][4]) < 1:
        contact_string_array[n][4] = 'Z'
    if contact_string_array[n][1] == "MG" or contact_string_array[n][1] == "MN" or
contact_string_array[n][1] == \
        "TB" or contact_string_array[n][1] == "NA" or contact_string_array[n][1] == "ZN" or
\
        contact_string_array[n][1] == "IR" or contact_string_array[n][1] == "CO" or
contact_string_array[n][1] \
        == "TL" or contact_string_array[n][1] == "BA" or contact_string_array[n][1] == "SR":
        metal_remove = True
        metal_index_remove.append(n)

if metal_remove:
    contact_string_array = np.delete(contact_string_array, metal_index_remove, 0)
    contact_index_array = np.delete(contact_index_array, metal_index_remove, 0)

# Find metals within 10 A of aoi_index
stored.metal_string = []
stored.metal_index = []
cmd.iterate("name MG within 10 of index " + str(aoi_index),
"stored.metal_string.append((resi, name, resn, b, "
                        "chain))")
    cmd.iterate("name MG within 10 of index " + str(aoi_index),
"stored.metal_index.append((index))")
    cmd.iterate("name MN within 10 of index " + str(aoi_index),
"stored.metal_string.append((resi, name, resn, b, "
                        "chain))")
    cmd.iterate("name MN within 10 of index " + str(aoi_index),
"stored.metal_index.append((index))")

```



```

cmd.iterate("name TB within 10 of index " + str(aoi_index), "stored.metal_string.append((resi,
name, resn, b, "
                                "chain))")
cmd.iterate("name TB within 10 of index " + str(aoi_index),
"stored.metal_index.append((index))")
cmd.iterate("name NA within 10 of index " + str(aoi_index),
"stored.metal_string.append((resi, name, resn, b, "
                                "chain))")
cmd.iterate("name NA within 10 of index " + str(aoi_index),
"stored.metal_index.append((index))")
cmd.iterate("name ZN within 10 of index " + str(aoi_index), "stored.metal_string.append((resi,
name, resn, b, "
                                "chain))")
cmd.iterate("name ZN within 10 of index " + str(aoi_index),
"stored.metal_index.append((index))")
cmd.iterate("name IR within 10 of index " + str(aoi_index), "stored.metal_string.append((resi,
name, resn, b, "
                                "chain))")
cmd.iterate("name IR within 10 of index " + str(aoi_index),
"stored.metal_index.append((index))")
cmd.iterate("name CO within 10 of index " + str(aoi_index),
"stored.metal_string.append((resi, name, resn, b, "
                                "chain))")
cmd.iterate("name CO within 10 of index " + str(aoi_index),
"stored.metal_index.append((index))")
cmd.iterate("name TL within 10 of index " + str(aoi_index), "stored.metal_string.append((resi,
name, resn, b, "
                                "chain))")
cmd.iterate("name TL within 10 of index " + str(aoi_index),
"stored.metal_index.append((index))")
cmd.iterate("name BA within 10 of index " + str(aoi_index),
"stored.metal_string.append((resi, name, resn, b, "
                                "chain))")
cmd.iterate("name BA within 10 of index " + str(aoi_index),
"stored.metal_index.append((index))")
cmd.iterate("name SR within 10 of index " + str(aoi_index), "stored.metal_string.append((resi,
name, resn, b, "
                                "chain))")
cmd.iterate("name SR within 10 of index " + str(aoi_index),
"stored.metal_index.append((index))")

metal_string_array = np.array(stored.metal_string)
metal_index_array = np.array(stored.metal_index, dtype=np.int32)

# Give the chain a default value if one is not already assigned
for n in range(len(metal_string_array)):

```

```

if len(metal_string_array[n][4]) < 1:
    metal_string_array[n][4] = 'Z'

# Open a text file to hold the data
# File will hold results of calculations
f = open('C:\\Users\\Drew\\Box Sync\\Drew\\Python\\Plugin Output\\%s.txt'
        % (pdb + '_' + search_name + '_' + searchResn), 'w')

# Create header
f.write("***%s Contacts***\n" % (search_name + searchResn))
f.write("Index" + '\t' + "Resi" + '\t' + "Name" + '\t' + "Distance" + '\t' + "Angle" + '\t'
        + "B-Factor" + '\t' + "Chain" + '\n')

# Determine the distance between each atom and target
# Write the distance to the file
for n in range(0, len(contact_index_array)):
    write = True

    dist = cmd.distance(("index " + str(aoi_index)), ("index " + str(contact_index_array[n])))
    try:
        if "MN" in contact_string_array[n][1]:
            ca_angle = 0
        elif "NCO" in contact_string_array[n][2]:
            ca_angle = 0
        elif "N" in contact_string_array[n][1]:
            ca_angle = getAngle(parent_string_array, parent_index_array, contact_string_array,
contact_index_array,
                                search_name, searchResn, aoi_index, contact_string_array[n][1],
                                contact_string_array[n][2], contact_string_array[n][0],
contact_string_array[n][4],
                                nucleotide_list)
        else:
            ca_angle = 0
    except ValueError:
        print("VALUE ERROR")
        ca_angle = 0

# Add a unique identifier for the AOI, since the contact_string_array has a fixed length,
# the atom name is saved to a different variable before the atom name is replaced by "AOI"
if searchResn == contact_string_array[n][2] and search_name == contact_string_array[n][
1] and dist < 1:
    AOI = contact_string_array[n][1]
    contact_string_array[n][1] = "AOI_"

    f.write(

```

```

        str(contact_index_array[n]) + '\t' + contact_string_array[n][2] +
contact_string_array[n][0] + '\t' +
        contact_string_array[n][1] + AOI + '\t' + "0.000000000000" + '\t' + str(ca_angle) + '\t' +
        contact_string_array[n][
            3] + '\t' + contact_string_array[n][4] + '\n')
write = False

if write:
    f.write(
        str(contact_index_array[n]) + '\t' + contact_string_array[n][2] +
contact_string_array[n][0] + '\t' +
        contact_string_array[n][1] + '\t' + str(dist) + '\t' + str(ca_angle) + '\t' +
contact_string_array[n][
            3] + '\t' + contact_string_array[n][4] + '\n')

# Determine the distance between each metal and target
# Write the distance to the file
for n in range(0, len(metal_index_array)):

    dist = cmd.distance(("index " + str(aoi_index)), ("index " + str(metal_index_array[n])))
    ca_angle = 0

    f.write(
        str(metal_index_array[n]) + '\t' + metal_string_array[n][2] + metal_string_array[n][0] +
'\t' +
        metal_string_array[n][1] + '\t' + str(dist) + '\t' + str(ca_angle) + '\t' +
metal_string_array[n][3] + '\t'
        + metal_string_array[n][4] + '\n')

f.close()

```

## II. $\alpha$ Plugin

```
from Tkinter import *
from pymol import cmd
from pymol import stored

def __init__(self):
    self.menuBar.addmenuitem("Plugin", "command",
                              "Alpha Data Collection",
                              label="Alpha Data Collection",
                              command=lambda s=self: number_of_chains(s))

# This is where all the text files will be dumped
directory = 'C:\\some directory'

# removes atoms of conformation B, if present
def remove_additional_conformations():

    stored.alt_b = []
    cmd.iterate("alt B", "stored.alt_b.append(index)")
    alt_b = stored.alt_b
    if len(alt_b) > 0:
        cmd.remove("alt B")
        print("Atoms included in alternative conformation B were removed.")

    stored.alt_all = []
    cmd.iterate("all", "stored.alt_all.append(alt)")
    alt_all = stored.alt_all

    alt_all_filtered = []
    for a in range(len(alt_all)):
        if len(alt_all[a]) != 0:
            alt_all_filtered.append(alt_all[a])

    additional_conformations = False
    if len(alt_all_filtered) > 0:
        for a in range(len(alt_all_filtered)):
            if alt_all_filtered[a] != 'A':
                additional_conformations = True
    if additional_conformations:
        print("ERROR: Additional conformations are present.")

def unique_residue_numbers(cofactor, minus_one_nucleotide):
```

```

# Retrieve the pdb of the crystal structure
cmd.select("index_1", "index 1")
stored.pdb = ""
cmd.iterate("index_1", "stored.pdb = model")
pdb = stored.pdb

if cofactor != "none":
    cmd.remove("resn " + cofactor)

# Create an array that contains the index and residue number of all 2' oxygens
cmd.select("two_prime_oxygen", "name O2")
stored.residue_identifier_O2 = []
stored.two_prime_oxygen_chain = []
stored.two_prime_oxygen_index = []
stored.two_prime_oxygen_b = []
cmd.iterate("two_prime_oxygen", "stored.residue_identifier_O2.append(resi)")
cmd.iterate("two_prime_oxygen", "stored.two_prime_oxygen_chain.append(chain)")
cmd.iterate("two_prime_oxygen", "stored.two_prime_oxygen_index.append(index)")
cmd.iterate("two_prime_oxygen", "stored.two_prime_oxygen_b.append(b)")
residue_identifier_O2 = stored.residue_identifier_O2
two_prime_oxygen_chain = stored.two_prime_oxygen_chain
two_prime_oxygen_index = stored.two_prime_oxygen_index
two_prime_oxygen_b = stored.two_prime_oxygen_b

# Create an array that contains the index and residue number of all phosphorus
cmd.select("phosphorus", "name P")
stored.residue_identifier_P = []
stored.phosphorus_chain = []
stored.phosphorus_index = []
stored.phosphorus_b = []
cmd.iterate("phosphorus", "stored.residue_identifier_P.append(resi)")
cmd.iterate("phosphorus", "stored.phosphorus_chain.append(chain)")
cmd.iterate("phosphorus", "stored.phosphorus_index.append(index)")
cmd.iterate("phosphorus", "stored.phosphorus_b.append(b)")
residue_identifier_P = stored.residue_identifier_P
phosphorus_chain = stored.phosphorus_chain
phosphorus_index = stored.phosphorus_index
phosphorus_b = stored.phosphorus_b

# Create an array that contains the index and residue number of all 5' oxygens
cmd.select("five_prime_oxygen", "name O5")
stored.residue_identifier_O5 = []
stored.five_prime_oxygen_index = []
stored.five_prime_oxygen_b = []

```

```

cmd.iterate("five_prime_oxygen", "stored.residue_identifier_O5.append(resi)")
cmd.iterate("five_prime_oxygen", "stored.five_prime_oxygen_index.append(index)")
cmd.iterate("five_prime_oxygen", "stored.five_prime_oxygen_b.append(b)")
residue_identifier_O5 = stored.residue_identifier_O5
five_prime_oxygen_index = stored.five_prime_oxygen_index
five_prime_oxygen_b = stored.five_prime_oxygen_b

```

# Adjusts the arrays if the 2' oxygen is not on the residue in front of the residue containing the phosphorus at the

```

# beginning of the arrays
count = 0
while str(residue_identifier_O2[0]) >= str(residue_identifier_P[0]):
    residue_identifier_P.remove(residue_identifier_P[0])
    phosphorus_chain.remove(phosphorus_chain[0])
    phosphorus_index.remove(phosphorus_index[0])
    phosphorus_b.remove(phosphorus_b[0])
    count += 1
    if count >= 11:
        print ("Something went wrong. Line 107")
        break

```

# Adjusts the arrays if the 2' oxygen is not on the residue in front of the residue containing the 5' oxygen at the

```

# beginning of the arrays
count = 0
while str(residue_identifier_O2[0]) >= str(residue_identifier_O5[0]):
    residue_identifier_O5.remove(residue_identifier_O5[0])
    five_prime_oxygen_index.remove(five_prime_oxygen_index[0])
    five_prime_oxygen_b.remove(five_prime_oxygen_b[0])
    count += 1
    if count >= 11:
        print ("Something went wrong. Line 119")
        break

```

# Adjusts the arrays such that the last O2' resides one residue before the last phosphorus

```

count = 0
while residue_identifier_O2[-1] >= residue_identifier_P[-1]:
    residue_identifier_O2.remove(residue_identifier_O2[-1])
    two_prime_oxygen_index.remove(two_prime_oxygen_index[-1])
    two_prime_oxygen_chain.remove(two_prime_oxygen_chain[-1])
    two_prime_oxygen_b.remove(two_prime_oxygen_b[-1])
    count += 1
    if count >= 11:
        print ("Something went wrong. Line 131")
        break

```

```

# Adjust the arrays when there is a break in the RNA (for 2 piece RNAs) or when the O2' has
been mutated
# to something else
range_of_minimum_length = range(
    min([len(residue_identifier_O2), len(residue_identifier_P), len(residue_identifier_O5)]))
for d in range_of_minimum_length:
    count = 0
    while ((int(residue_identifier_O2[d]) + 1) != int(residue_identifier_P[d])) or \
          ((int(residue_identifier_O2[d]) + 1) != int(residue_identifier_O5[d])):
        if ((int(residue_identifier_O2[d]) + 1) > (int(residue_identifier_P[d]))) and \
            ((int(residue_identifier_O2[d]) + 1) > int(residue_identifier_O5[d])):
            residue_identifier_P.remove(residue_identifier_P[d])
            phosphorus_chain.remove(phosphorus_chain[d])
            phosphorus_index.remove(phosphorus_index[d])
            phosphorus_b.remove(phosphorus_b[d])
            residue_identifier_O5.remove(residue_identifier_O5[d])
            five_prime_oxygen_index.remove(five_prime_oxygen_index[d])
            five_prime_oxygen_b.remove(five_prime_oxygen_b[d])
            if min([len(residue_identifier_O2), len(residue_identifier_P),
len(residue_identifier_O5))] < len(
                range_of_minimum_length):
                range_of_minimum_length.remove(range_of_minimum_length[-1])
            count += 1
            if count >= 100:
                print("Something went wrong. Line 156")
                break
        elif ((int(residue_identifier_O2[d]) + 1) > (int(residue_identifier_P[d]))) and \
            ((int(residue_identifier_O2[d]) + 1) == int(residue_identifier_O5[d])):
            residue_identifier_P.remove(residue_identifier_P[d])
            phosphorus_chain.remove(phosphorus_chain[d])
            phosphorus_index.remove(phosphorus_index[d])
            phosphorus_b.remove(phosphorus_b[d])
            if min([len(residue_identifier_O2), len(residue_identifier_P),
len(residue_identifier_O5))] < len(
                range_of_minimum_length):
                range_of_minimum_length.remove(range_of_minimum_length[-1])
            count += 1
            if count >= 100:
                print("Something went wrong. Line 169")
                break
        elif ((int(residue_identifier_O2[d]) + 1) == (int(residue_identifier_P[d]))) and \
            ((int(residue_identifier_O2[d]) + 1) > int(residue_identifier_O5[d])):
            residue_identifier_O5.remove(residue_identifier_O5[d])
            five_prime_oxygen_index.remove(five_prime_oxygen_index[d])
            five_prime_oxygen_b.remove(five_prime_oxygen_b[d])

```

```

        if min([len(residue_identifier_O2), len(residue_identifier_P),
len(residue_identifier_O5)]) < len(
            range_of_minimum_length):
            range_of_minimum_length.remove(range_of_minimum_length[-1])
            count += 1
            if count >= 100:
                print("Something went wrong. Line 181")
                break
elif ((int(residue_identifier_O2[d]) + 1) < (int(residue_identifier_P[d]))) and \
    ((int(residue_identifier_O2[d]) + 1) < int(residue_identifier_O5[d])):
    residue_identifier_O2.remove(residue_identifier_O2[d])
    two_prime_oxygen_index.remove(two_prime_oxygen_index[d])
    two_prime_oxygen_chain.remove(two_prime_oxygen_chain[d])
    if min([len(residue_identifier_O2), len(residue_identifier_P),
len(residue_identifier_O5)]) < len(
        range_of_minimum_length):
            range_of_minimum_length.remove(range_of_minimum_length[-1])
            count += 1
            if count >= 100:
                print("Something went wrong. Line 193")
                break
elif ((int(residue_identifier_O2[d]) + 1) < int(residue_identifier_P[d])) and \
    ((int(residue_identifier_O2[d]) + 1) == int(residue_identifier_O5[d])):
    residue_identifier_O2.remove(residue_identifier_O2[d])
    two_prime_oxygen_index.remove(two_prime_oxygen_index[d])
    two_prime_oxygen_chain.remove(two_prime_oxygen_chain[d])
    residue_identifier_O5.remove(residue_identifier_O5[d])
    five_prime_oxygen_index.remove(five_prime_oxygen_index[d])
    five_prime_oxygen_b.remove(five_prime_oxygen_b[d])
    if min([len(residue_identifier_O2), len(residue_identifier_P),
len(residue_identifier_O5)]) < len(
        range_of_minimum_length):
            range_of_minimum_length.remove(range_of_minimum_length[-1])
            count += 1
            if count >= 100:
                print("Something went wrong. Line 208")
                break
elif ((int(residue_identifier_O2[d]) + 1) == int(residue_identifier_P[d])) and \
    ((int(residue_identifier_O2[d]) + 1) < int(residue_identifier_O5[d])):
    residue_identifier_O2.remove(residue_identifier_O2[d])
    two_prime_oxygen_index.remove(two_prime_oxygen_index[d])
    two_prime_oxygen_chain.remove(two_prime_oxygen_chain[d])
    residue_identifier_P.remove(residue_identifier_P[d])
    phosphorus_chain.remove(phosphorus_chain[d])
    phosphorus_index.remove(phosphorus_index[d])
    phosphorus_b.remove(phosphorus_b[d])

```



```

        if min([len(residue_identifier_O2), len(residue_identifier_P),
len(residue_identifier_O5)]) < len(
            range_of_minimum_length):
            range_of_minimum_length.remove(range_of_minimum_length[-1])
            count += 1
            if count >= 100:
                print("Something went wrong. Line 224")
                break
            else:
                print("Something went wrong. Line 227")
                break

# Ensures that each residue stored in the program that contains a phosphorus also contains a
O5'
if residue_identifier_P != residue_identifier_O5:
    print ("The array containing residues with phosphorus do not match the array containing
residues with O5'")
    return

# compare letters of chains for P and O2' to check if they are in the same chain.
# If they are not, the angle won't be calculated
for d in range_of_minimum_length:
    count = 0
    while (str(two_prime_oxygen_chain[d])) != str(phosphorus_chain[d]):
        print("An angle was not determined between resi " + str(
            residue_identifier_O2[d]) + " and resi " +
            str(residue_identifier_P[d]))
        phosphorus_chain.remove(phosphorus_chain[d])
        residue_identifier_P.remove(residue_identifier_P[d])
        phosphorus_index.remove(phosphorus_index[d])
        phosphorus_b.remove(phosphorus_b[d])
        residue_identifier_O5.remove(residue_identifier_O5[d])
        five_prime_oxygen_index.remove(five_prime_oxygen_index[d])
        five_prime_oxygen_b.remove(five_prime_oxygen_b[d])
        residue_identifier_O2.remove(residue_identifier_O2[d])
        two_prime_oxygen_index.remove(two_prime_oxygen_index[d])
        two_prime_oxygen_chain.remove(two_prime_oxygen_chain[d])
        range_of_minimum_length.remove(range_of_minimum_length[-1])
        count += 1
        if count >= 100:
            print("Something went wrong. Line 256")
            break

# Finds the angles and writes them to a text file
with open(directory + "\\%s Non-Scissile Alpha.txt" % pdb, "w") as f_non_scissile:

```

```

    f_non_scissile.write("*** %s Non-Scissile Alpha ***" % pdb + "\n" + "chain" + '\t' + "resi"
+ "\t" + "angle" +
        "\n")
    for i in range(len(residue_identifier_O2)):
        angle = cmd.angle("Residue: " + residue_identifier_O2[i],
            "index " + str(two_prime_oxygen_index[i]),
            "index " + str(phosphorus_index[i]),
            "index " + str(five_prime_oxygen_index[i]))

        # Give a default chain letter of Z if no chain letter was previously assigned
        if len(two_prime_oxygen_chain[i]) < 1:
            two_prime_oxygen_chain[i] = 'Z'

        # Writes the angle about the scissile phosphate to a separate text file
        if residue_identifier_O2[i] == minus_one_nucleotide:
            with open(directory + "\\%s Scissile Alpha.txt" % pdb,
                "w") as f_scissile:
                f_scissile.write(
                    "*** %s Scissile Alpha ***" % pdb + "\n" + "chain" + '\t' + "resi" + "\t" + "angle"
+ "\n")
                f_scissile.write(
                    two_prime_oxygen_chain[i] + "\t" + residue_identifier_O2[i] + "\t" + str(angle) +
                    "\n")
            else:
                f_non_scissile.write(two_prime_oxygen_chain[i] + "\t" + residue_identifier_O2[i] +
                    "\t" + str(angle) +
                    "\n")

def repetitive_residue_numbers(cofactor, minus_one_nucleotide, chain_letters):

    # Retrieve the pdb of the crystal structure
    cmd.select("index_1", "index 1")
    stored.pdb = ""
    cmd.iterate("index_1", "stored.pdb = model")
    pdb = stored.pdb

    # Removes all atoms within the object specified by the user
    if cofactor != "none":
        cmd.remove("resn " + cofactor)

    chain_letters = chain_letters.upper().split(' ')

    f_non_scissile = open(directory + "\\%s Non-Scissile Alpha.txt" % pdb, "w")
    f_non_scissile.write("*** %s Non-Scissile Alpha ***" % pdb + "\n" + "chain" + "\t" + "resi"
+ "\t" + "angle" + "\n")

```

```

# Iterates through the chains specified by the user
for z in range(len(chain_letters)):

    # Continues to the next iteration if the current chain contains no atoms
    if (cmd.count_atoms("chain %s" % chain_letters[z])) <= 0:
        continue

    # Any chains that contain amino acids are excluded
    stored.amino_acid_test = []
    cmd.iterate("chain " + chain_letters[z], "stored.amino_acid_test.append(resn)")
    amino_acid_test = stored.amino_acid_test
    if ("ARG" or "HIS" or "LYS" or "ASP" or "GIU" or "SER" or "THR" or "ASN" or "GLN"
or "CYS" or "SEC" or "GLY"
        or "PRO" or "ALA" or "VAL" or "ILE" or "LEU" or "MET" or "PHE" or "TYR" or
"TRP") in \
        amino_acid_test:
        continue

    else:
        # Create an array that contains the index and residue number of all 2' oxygens
        cmd.select("two_prime_oxygen", "name O2' and chain " + chain_letters[z])
        stored.residue_idenfifier_O2 = []
        stored.two_prime_oxygen_index = []
        stored.two_prime_oxygen_chain = []
        stored.two_prime_oxygen_b = []
        cmd.iterate("two_prime_oxygen", "stored.residue_idenfifier_O2.append(resi)")
        cmd.iterate("two_prime_oxygen", "stored.two_prime_oxygen_index.append(index)")
        cmd.iterate("two_prime_oxygen", "stored.two_prime_oxygen_chain.append(chain)")
        cmd.iterate("two_prime_oxygen", "stored.two_prime_oxygen_b.append(b)")
        residue_idenfifier_O2 = stored.residue_idenfifier_O2
        two_prime_oxygen_chain = stored.two_prime_oxygen_chain
        two_prime_oxygen_index = stored.two_prime_oxygen_index
        two_prime_oxygen_b = stored.two_prime_oxygen_b

        # Create an array that contains the index and residue number of all phosphorus
        cmd.select("phosphorus", "name P and chain " + chain_letters[z])
        stored.residue_idenfifier_P = []
        stored.phosphorus_index = []
        stored.phosphorus_chain = []
        stored.phosphorus_b = []
        cmd.iterate("phosphorus", "stored.residue_idenfifier_P.append(resi)")
        cmd.iterate("phosphorus", "stored.phosphorus_index.append(index)")
        cmd.iterate("phosphorus", "stored.phosphorus_chain.append(chain)")
        cmd.iterate("phosphorus", "stored.phosphorus_b.append(b)")
        residue_idenfifier_P = stored.residue_idenfifier_P

```

```

phosphorus_chain = stored.phosphorus_chain
phosphorus_index = stored.phosphorus_index
phosphorus_b = stored.phosphorus_b

# Create an array that contains the index and residue number of all 5' oxygens
cmd.select("five_prime_oxygen", "name O5' and chain " + chain_letters[z])
stored.residue_identifier_O5 = []
stored.five_prime_oxygen_index = []
stored.five_prime_oxygen_b = []
cmd.iterate("five_prime_oxygen", "stored.residue_identifier_O5.append(resi)")
cmd.iterate("five_prime_oxygen", "stored.five_prime_oxygen_index.append(index)")
cmd.iterate("five_prime_oxygen", "stored.five_prime_oxygen_b.append(b)")
residue_identifier_O5 = stored.residue_identifier_O5
five_prime_oxygen_index = stored.five_prime_oxygen_index
five_prime_oxygen_b = stored.five_prime_oxygen_b

# Adjusts the arrays if the 2' oxygen is not on the residue in front of the residue
containing the
# phosphorus at the beginning of the arrays
count = 0
while str(residue_identifier_O2[0]) >= str(residue_identifier_P[0]):
    residue_identifier_P.remove(residue_identifier_P[0])
    phosphorus_chain.remove(phosphorus_chain[0])
    phosphorus_index.remove(phosphorus_index[0])
    phosphorus_b.remove(phosphorus_b[0])
    count += 1
    if count >= 11:
        print ("Something went wrong. Line 372")
        break

# Adjusts the arrays if the 2' oxygen is not on the residue in front of the residue
containing the 5' oxygen
# at the beginning of the arrays
count = 0
while str(residue_identifier_O2[0]) >= str(residue_identifier_O5[0]):
    residue_identifier_O5.remove(residue_identifier_O5[0])
    five_prime_oxygen_index.remove(five_prime_oxygen_index[0])
    five_prime_oxygen_b.remove(five_prime_oxygen_b[0])
    count += 1
    if count >= 11:
        print ("Something went wrong. Line 384")
        break

# Adjusts the arrays such that the last O2' resides one residue before the last phosphorus
count = 0
while residue_identifier_O2[-1] >= residue_identifier_P[-1]:

```

```

residue_identifier_O2.remove(residue_identifier_O2[-1])
two_prime_oxygen_index.remove(two_prime_oxygen_index[-1])
two_prime_oxygen_chain.remove(two_prime_oxygen_chain[-1])
two_prime_oxygen_b.remove(two_prime_oxygen_b[-1])
count += 1
if count >= 11:
    print ("Something went wrong. Line 396")
    break

# Adjust the arrays when there is a break in the RNA (for 2 piece RNAs) or when the O2'
has been mutated
# to something else
range_of_minimum_length = range(min([len(residue_identifier_O2),
len(residue_identifier_P),
len(residue_identifier_O5)]))
for d in range_of_minimum_length:
    count = 0
    while ((int(residue_identifier_O2[d]) + 1) != int(residue_identifier_P[d])) or \
          ((int(residue_identifier_O2[d]) + 1) != int(residue_identifier_O5[d])):
        if ((int(residue_identifier_O2[d]) + 1) > (int(residue_identifier_P[d]))) and \
            ((int(residue_identifier_O2[d]) + 1) > int(residue_identifier_O5[d])):
            residue_identifier_P.remove(residue_identifier_P[d])
            phosphorus_chain.remove(phosphorus_chain[d])
            phosphorus_index.remove(phosphorus_index[d])
            phosphorus_b.remove(phosphorus_b[d])
            residue_identifier_O5.remove(residue_identifier_O5[d])
            five_prime_oxygen_index.remove(five_prime_oxygen_index[d])
            five_prime_oxygen_b.remove(five_prime_oxygen_b[d])
            if min([len(residue_identifier_O2), len(residue_identifier_P),
len(residue_identifier_O5)]) < \
                len(range_of_minimum_length):
                range_of_minimum_length.remove(range_of_minimum_length[-1])
            count += 1
            if count >= 100:
                print("Something went wrong. Line 421")
                break
        elif ((int(residue_identifier_O2[d]) + 1) > (int(residue_identifier_P[d]))) and \
            ((int(residue_identifier_O2[d]) + 1) == int(residue_identifier_O5[d])):
            residue_identifier_P.remove(residue_identifier_P[d])
            phosphorus_chain.remove(phosphorus_chain[d])
            phosphorus_index.remove(phosphorus_index[d])
            phosphorus_b.remove(phosphorus_b[d])
            if min([len(residue_identifier_O2), len(residue_identifier_P),
len(residue_identifier_O5)]) < \
                len(range_of_minimum_length):
                range_of_minimum_length.remove(range_of_minimum_length[-1])

```

```

count += 1
if count >= 100:
    print("Something went wrong. Line 434")
    break
elif ((int(residue_identifier_O2[d]) + 1) == (int(residue_identifier_P[d]))) and \
    ((int(residue_identifier_O2[d]) + 1) > int(residue_identifier_O5[d])):
    residue_identifier_O5.remove(residue_identifier_O5[d])
    five_prime_oxygen_index.remove(five_prime_oxygen_index[d])
    five_prime_oxygen_b.remove(five_prime_oxygen_b[d])
    if min([len(residue_identifier_O2), len(residue_identifier_P),
len(residue_identifier_O5)]) < \
        len(range_of_minimum_length):
        range_of_minimum_length.remove(range_of_minimum_length[-1])
count += 1
if count >= 100:
    print("Something went wrong. Line 446")
    break
elif ((int(residue_identifier_O2[d]) + 1) < (int(residue_identifier_P[d]))) and \
    ((int(residue_identifier_O2[d]) + 1) < int(residue_identifier_O5[d])):
    residue_identifier_O2.remove(residue_identifier_O2[d])
    two_prime_oxygen_index.remove(two_prime_oxygen_index[d])
    two_prime_oxygen_chain.remove(two_prime_oxygen_chain[d])
    if min([len(residue_identifier_O2), len(residue_identifier_P),
len(residue_identifier_O5)]) < \
        len(range_of_minimum_length):
        range_of_minimum_length.remove(range_of_minimum_length[-1])
count += 1
if count >= 100:
    print("Something went wrong. Line 458")
    break
elif ((int(residue_identifier_O2[d]) + 1) < int(residue_identifier_P[d])) and \
    ((int(residue_identifier_O2[d]) + 1) == int(residue_identifier_O5[d])):
    residue_identifier_O2.remove(residue_identifier_O2[d])
    two_prime_oxygen_index.remove(two_prime_oxygen_index[d])
    two_prime_oxygen_chain.remove(two_prime_oxygen_chain[d])
    residue_identifier_O5.remove(residue_identifier_O5[d])
    five_prime_oxygen_index.remove(five_prime_oxygen_index[d])
    five_prime_oxygen_b.remove(five_prime_oxygen_b[d])
    if min([len(residue_identifier_O2), len(residue_identifier_P),
len(residue_identifier_O5)]) < \
        len(range_of_minimum_length):
        range_of_minimum_length.remove(range_of_minimum_length[-1])
count += 1
if count >= 100:
    print("Something went wrong. Line 473")
    break

```

```

elif ((int(residue_identifer_O2[d]) + 1) == int(residue_identifer_P[d])) and \
      ((int(residue_identifer_O2[d]) + 1) < int(residue_identifer_O5[d])):
    residue_identifer_O2.remove(residue_identifer_O2[d])
    two_prime_oxygen_index.remove(two_prime_oxygen_index[d])
    two_prime_oxygen_chain.remove(two_prime_oxygen_chain[d])
    residue_identifer_P.remove(residue_identifer_P[d])
    phosphorus_chain.remove(phosphorus_chain[d])
    phosphorus_index.remove(phosphorus_index[d])
    phosphorus_b.remove(phosphorus_b[d])
    if min([len(residue_identifer_O2), len(residue_identifer_P),
len(residue_identifer_O5)]) < \
          len(range_of_minimum_length):
        range_of_minimum_length.remove(range_of_minimum_length[-1])
        count += 1
        if count >= 100:
            print("Something went wrong. Line 489")
            break
        else:
            print("Something went wrong. Line 492")
            break

# Ensures that each residue stored in the program that contains a phosphorus also
contains a O5'
if residue_identifer_P != residue_identifer_O5:
    print ("The array containing residues with phosphorus do not match the array
containing residues with "
          "O5'")
    break

# compare letters of chains for P and O2' to check if they are in the same chain.
# If they are not, the angle won't be calculated
for d in range_of_minimum_length:
    count = 0
    while (str(two_prime_oxygen_chain[d])) != str(phosphorus_chain[d]):
        print("An angle was not determined between resi " + str(
            residue_identifer_O2[d]) + " and resi " +
            str(residue_identifer_P[d]))
        phosphorus_chain.remove(phosphorus_chain[d])
        residue_identifer_P.remove(residue_identifer_P[d])
        phosphorus_index.remove(phosphorus_index[d])
        phosphorus_b.remove(phosphorus_b[d])
        residue_identifer_O5.remove(residue_identifer_O5[d])
        five_prime_oxygen_index.remove(five_prime_oxygen_index[d])
        five_prime_oxygen_b.remove(five_prime_oxygen_b[d])
        residue_identifer_O2.remove(residue_identifer_O2[d])
        two_prime_oxygen_index.remove(two_prime_oxygen_index[d])

```

```

two_prime_oxygen_chain.remove(two_prime_oxygen_chain[d])
range_of_minimum_length.remove(range_of_minimum_length[-1])
count += 1
if count >= 100:
    print("Something went wrong. Line 522")
    break

# Finds the angles and writes them to a text file
for i in range(len(residue_identifier_O2)):
    angle = cmd.angle("Residue: " + residue_identifier_O2[i],
                     "index " + str(two_prime_oxygen_index[i]),
                     "index " + str(phosphorus_index[i]),
                     "index " + str(five_prime_oxygen_index[i]))

# Give a default chain letter of Z if no chain letter was previously assigned
if len(two_prime_oxygen_chain[i]) < 1:
    two_prime_oxygen_chain[i] = 'Z'

# Writes the angle about the scissile phosphate to a separate text file
if residue_identifier_O2[i] == minus_one_nucleotide and two_prime_oxygen_chain[i] ==
chain_letters[0]:
    with open(directory + "\\%s Scissile Alpha.txt" % pdb,
              "w") as f_scissile:
        f_scissile.write(
            "*** %s Scissile Alpha ***" % pdb + "\n" + "chain" + '\t' + "resi" + "\t" + "angle"
+ "\n")
        f_scissile.write(
            two_prime_oxygen_chain[i] + "\t" + residue_identifier_O2[i] + "\t" + str(angle) +
"\n")
    else:
        f_non_scissile.write(two_prime_oxygen_chain[i] + "\t" + residue_identifier_O2[i] +
"\t" + str(angle) +
            "\n")

f_non_scissile.close()

def get_chain_letters(cofactor, minus_one_nucleotide):

# stores a list of chain letters entered by the user to collect data on
# the letters should be separated by a space and the first letter is assumed to contain the scissile
phosphate
def run_repetitive_residue_numbers():

    chain_letters = e1.get()
    root.destroy()

```



```

    repetitive_residue_numbers(cofactor, minus_one_nucleotide, chain_letters)

root = Tk()

l1 = Label(root, text="Chains: ")
l1.grid(row=1, column=0)

e1 = Entry(root)
e1.grid(row=1, column=1)
e1.delete(0, END)
e1.insert(0, "A")

B1 = Button(root, text="Enter", command=run_repetitive_residue_numbers)
B1.grid(columnspan=2)

def key(event):
    run_repetitive_residue_numbers()

root.bind("<Return>", key)
root.focus_set()

root.mainloop()

cmd.extend('number_of_chains', number_of_chains)

def number_of_chains(app):
    # stores -1 residue number of scissile phosphate and cofactor name (if present) entered by the
    user
    def get_angle():
        cofactor = e1.get()
        minus_one_nucleotide = e2.get()
        root.destroy()
        remove_additional_conformations()

    # determines whether there are repeating residue numbers in the structure
    stored.residue_identifier_O2 = []
    cmd.iterate("name O2", "stored.residue_identifier_O2.append(resi)")
    residue_identifier_O2 = stored.residue_identifier_O2
    number = []
    for a in range(len(residue_identifier_O2)):
        number.append(residue_identifier_O2.count(str(residue_identifier_O2[a])))
    repetitive = False
    for a in range(len(number)):
        if number[a] > 1:

```

```

    repetitive = True

    # two separate routes are taken depending on whether the nucleotide numbering is repetitive
    if repetitive:
        get_chain_letters(cofactor, minus_one_nucleotide)
    else:
        unique_residue_numbers(cofactor, minus_one_nucleotide)

root = Tk()

l1 = Label(root, text="Co-factor name: ")
l1.grid(row=1, column=0)

e1 = Entry(root)
e1.grid(row=1, column=1)
e1.delete(0, END)
e1.insert(0, "none")

l2 = Label(root, text="-1 Nucleotide: ")
l2.grid(row=2, column=0)

e2 = Entry(root)
e2.grid(row=2, column=1)
e2.delete(0, END)
e2.insert(0, "0")

B1 = Button(root, text="Enter", command=get_angle)
B1.grid(columnspan=2)

def key(event):
    get_angle()

root.bind("<Return>", key)
root.focus_set()

root.mainloop()

cmd.extend('number_of_chains', number_of_chains)

```

### III. $\gamma$ , $\beta$ , and $\delta$ All-Phosphates Plugin

```
from Tkinter import *
import numpy as np
from pymol import cmd, stored

def __init__(self):
    self.menuBar.addmenuitem('Plugin', 'command',
                              'All Phosphate Contacts',
                              label='All Phosphate Contacts',
                              command=lambda s=self: get_info(s))

# This is where all the text files will be dumped
directory = 'C:\\some directory'

# Pops up a window which accepts input from the user
def get_info(app):
    root = Tk()

    remove_additional_conformations()

    # Runs when the O2' button is pressed
    def get_O2_data():
        minus_one_nucleotide = E1.get()
        chain_array = E3.get().upper().split(' ')
        for a in range(len(chain_array)):
            if chain_array[a] == 'NONE':
                continue
            elif len(chain_array[a]) != 1:
                print("ERROR: Incorrect entry.")
            return

    # Checks that the user didn't enter more than 5 chain letters
    if len(chain_array) > 5:
        print("ERROR: This plugin cannot handle more than 5 chains.")
        return

    # Checks whether or not an amino is substituted in for the 2'-OH according to the user input
    amino_substitution = False
    if (E4.get() == 'y') or (E4.get() == 'Y'):
        amino_substitution = True
    elif (E4.get() == 'n') or (E4.get() == 'N'):
        amino_substitution = False
    else:
```

```

        print("ERROR: Incorrect entry.")
        return
    root.destroy()
    find_O2_CA(minus_one_nucleotide, chain_array, amino_substitution)

# Runs when the NBO button is pressed
def get_NBO_data():
    plus_one_nucleotide = E2.get()
    chain_array = E3.get().upper().split(' ')
    for a in range(len(chain_array)):
        if chain_array[a] == 'NONE':
            continue
        elif len(chain_array[a]) != 1:
            print("ERROR: Incorrect entry.")
            return

    # Checks that the user didn't enter more than 5 chain letters
    if len(chain_array) > 5:
        print("ERROR: This plugin cannot handle more than 5 chains.")
        return
    root.destroy()
    find_NBO_CA(plus_one_nucleotide, chain_array)

# Runs when the O5' button is pressed
def get_O5_data():
    plus_one_nucleotide = E2.get()
    chain_array = E3.get().upper().split(' ')
    for a in range(len(chain_array)):
        if chain_array[a] == 'NONE':
            continue
        elif len(chain_array[a]) != 1:
            print("ERROR: Incorrect entry.")
            return

    # Checks that the user didn't enter more than 5 chain letters
    if len(chain_array) > 5:
        print("ERROR: This plugin cannot handle more than 5 chains.")
        return
    root.destroy()
    find_O5_CA(plus_one_nucleotide, chain_array)

# Runs when the All button is pressed
def get_all_data():
    minus_one_nucleotide = E1.get()
    plus_one_nucleotide = E2.get()
    chain_array = E3.get().upper().split(' ')

```

```

for a in range(len(chain_array)):
    if chain_array[a] == 'NONE':
        continue
    elif len(chain_array[a]) != 1:
        print("ERROR: Incorrect entry.")
        return

# Checks that the user didn't enter more than 5 chain letters
if len(chain_array) > 5:
    print("ERROR: This plugin cannot handle more than 5 chains.")
    return

# Checks whether or not an amino is substituted in for the 2'-OH according to the user input
amino_substitution = False
if (E4.get() == 'y') or (E4.get() == 'Y'):
    amino_substitution = True
elif (E4.get() == 'n') or (E4.get() == 'N'):
    amino_substitution = False
else:
    print("ERROR: Incorrect entry.")
    return
root.destroy()
find_O2_CA(minus_one_nucleotide, chain_array, amino_substitution)
find_NBO_CA(plus_one_nucleotide, chain_array)
find_O5_CA(plus_one_nucleotide, chain_array)

L1 = Label(root, text="Scissile Phosphate -1 Nucleotide:")
L1.grid(row=0, column=0, columnspan=3)

E1 = Entry(root, width=6, justify=CENTER)
E1.grid(row=0, column=3)
E1.delete(0, END)
E1.insert(0, '4')

L2 = Label(root, text="Scissile Phosphate +1 Nucleotide:")
L2.grid(row=1, column=0, columnspan=3)

E2 = Entry(root, width=6, justify=CENTER)
E2.grid(row=1, column=3)
E2.delete(0, END)
E2.insert(0, '5')

L3 = Label(root, text="Chains of Interest:")
L3.grid(row=2, column=0, columnspan=3)

E3 = Entry(root, width=6, justify=CENTER)

```

```

E3.grid(row=2, column=3)
E3.delete(0, END)
E3.insert(0, 'A')

L4 = Label(root, text="N2' at -1 Nucleotide? (y/n):")
L4.grid(row=3, column=0, columnspan=3)

E4= Entry(root, width=6, justify=CENTER)
E4.grid(row=3, column=3)
E4.delete(0, END)
E4.insert(0, "n")

B1 = Button(root, text="O2'", width=8, command=get_O2_data)
B1.grid(row=4, column=0)

B2 = Button(root, text="NBO", width=8, command=get_NBO_data)
B2.grid(row=4, column=1)

B3 = Button(root, text="O5'", width=8, command=get_O5_data)
B3.grid(row=4, column=2)

B4 = Button(root, text="All", width=8, command=get_all_data)
B4.grid(row=4, column=3)

def key(event):
    get_all_data()

root.bind("<Return>", key)
root.focus_set()

mainloop()

cmd.extend('get_info', get_info)

# removes atoms of conformation B, if present
def remove_additional Conformations():

    stored.alt_b = []
    cmd.iterate("alt B", "stored.alt_b.append(index)")
    alt_b = stored.alt_b
    if len(alt_b) > 0:
        cmd.remove("alt B")
        print("Atoms included in alternative conformation B were removed.")

    stored.alt_all = []

```

```

cmd.iterate("all", "stored.alt_all.append(alt)")
alt_all = stored.alt_all

alt_all_filtered = []
for a in range(len(alt_all)):
    if len(alt_all[a]) != 0:
        alt_all_filtered.append(alt_all[a])

additional_conformations = False
if len(alt_all_filtered) > 0:
    for a in range(len(alt_all_filtered)):
        if alt_all_filtered[a] != 'A':
            additional_conformations = True
if additional_conformations:
    print("ERROR: Additional conformations are present.")

def find_O2_CA(minus_one_nucleotide, chain_array, amino_substitution):

    stored.pdb = ""
    cmd.iterate("index 1", "stored.pdb = model")
    pdb = stored.pdb

    # Finds and stores information on the N2', if present and specified by the user
    amino_info = []
    if amino_substitution:
        stored.amino_info = []
        cmd.iterate("elem N within 1.8 of (chain " + chain_array[0] + " and resi " +
            minus_one_nucleotide +
            " and name C2)", "stored.amino_info.append((index, name, elem, resn, resi, chain,
b))")
        amino_info = stored.amino_info

    stored.O2_info_1 = []
    stored.O2_info_2 = []
    stored.O2_info_3 = []
    stored.O2_info_4 = []
    stored.O2_info_5 = []
    stored.C2_info_1 = []
    stored.C2_info_2 = []
    stored.C2_info_3 = []
    stored.C2_info_4 = []
    stored.C2_info_5 = []

    # Generates list(s) of all O2's within each nucleotide linkage for the chains specified by the
user

```

```

if chain_array[0] == 'NONE':
    cmd.iterate("name O2",
               "stored.O2_info_1.append((index, name, elem, resn, resi, chain, b))")
    cmd.iterate("name C2",
               "stored.C2_info_1.append((index, name, elem, resn, resi, chain, b))")
    O2_info_1 = np.array(stored.O2_info_1)
    C2_info_1 = np.array(stored.C2_info_1)

    # Removes the last O2' if it resides on the last residue
    if C2_info_1[-1][4] == O2_info_1[-1][4] and C2_info_1[-1][5] == O2_info_1[-1][5]:
        O2_info_1 = np.delete(O2_info_1, -1, 0)
    O2_info = O2_info_1

elif len(chain_array) == 1:
    cmd.iterate("name O2' and (chain " + chain_array[0] + ")",
               "stored.O2_info_1.append((index, name, elem, resn, resi, chain, b))")
    cmd.iterate("name C2' and (chain " + chain_array[0] + ")",
               "stored.C2_info_1.append((index, name, elem, resn, resi, chain, b))")
    O2_info_1 = np.array(stored.O2_info_1)
    C2_info_1 = np.array(stored.C2_info_1)

    # Removes the last O2' if it resides on the last residue
    if C2_info_1[-1][4] == O2_info_1[-1][4] and C2_info_1[-1][5] == O2_info_1[-1][5]:
        O2_info_1 = np.delete(O2_info_1, -1, 0)
    O2_info = O2_info_1

elif len(chain_array) == 2:
    cmd.iterate("name O2' and (chain " + chain_array[0] + ")",
               "stored.O2_info_1.append((index, name, elem, resn, resi, chain, b))")
    cmd.iterate("name O2' and (chain " + chain_array[1] + ")",
               "stored.O2_info_2.append((index, name, elem, resn, resi, chain, b))")
    cmd.iterate("name C2' and (chain " + chain_array[0] + ")",
               "stored.C2_info_1.append((index, name, elem, resn, resi, chain, b))")
    cmd.iterate("name C2' and (chain " + chain_array[1] + ")",
               "stored.C2_info_2.append((index, name, elem, resn, resi, chain, b))")
    O2_info_1 = np.array(stored.O2_info_1)
    O2_info_2 = np.array(stored.O2_info_2)
    C2_info_1 = np.array(stored.C2_info_1)
    C2_info_2 = np.array(stored.C2_info_2)

    # Removes the last O2' if it resides on the last residue
    if C2_info_1[-1][4] == O2_info_1[-1][4] and C2_info_1[-1][5] == O2_info_1[-1][5]:
        O2_info_1 = np.delete(O2_info_1, -1, 0)
    if C2_info_2[-1][4] == O2_info_2[-1][4] and C2_info_2[-1][5] == O2_info_2[-1][5]:
        O2_info_2 = np.delete(O2_info_2, -1, 0)
    O2_info = np.concatenate((O2_info_1, O2_info_2))

```



```

elif len(chain_array) == 3:
    cmd.iterate("name O2' and (chain " + chain_array[0] + ")",
               "stored.O2_info_1.append((index, name, elem, resn, resi, chain, b))")
    cmd.iterate("name O2' and (chain " + chain_array[1] + ")",
               "stored.O2_info_2.append((index, name, elem, resn, resi, chain, b))")
    cmd.iterate("name O2' and (chain " + chain_array[2] + ")",
               "stored.O2_info_3.append((index, name, elem, resn, resi, chain, b))")
    cmd.iterate("name C2' and (chain " + chain_array[0] + ")",
               "stored.C2_info_1.append((index, name, elem, resn, resi, chain, b))")
    cmd.iterate("name C2' and (chain " + chain_array[1] + ")",
               "stored.C2_info_2.append((index, name, elem, resn, resi, chain, b))")
    cmd.iterate("name C2' and (chain " + chain_array[2] + ")",
               "stored.C2_info_3.append((index, name, elem, resn, resi, chain, b))")
    O2_info_1 = np.array(stored.O2_info_1)
    O2_info_2 = np.array(stored.O2_info_2)
    O2_info_3 = np.array(stored.O2_info_3)
    C2_info_1 = np.array(stored.C2_info_1)
    C2_info_2 = np.array(stored.C2_info_2)
    C2_info_3 = np.array(stored.C2_info_3)

    # Removes the last O2' if it resides on the last residue
    if C2_info_1[-1][4] == O2_info_1[-1][4] and C2_info_1[-1][5] == O2_info_1[-1][5]:
        O2_info_1 = np.delete(O2_info_1, -1, 0)
    if C2_info_2[-1][4] == O2_info_2[-1][4] and C2_info_2[-1][5] == O2_info_2[-1][5]:
        O2_info_2 = np.delete(O2_info_2, -1, 0)
    if C2_info_3[-1][4] == O2_info_3[-1][4] and C2_info_3[-1][5] == O2_info_3[-1][5]:
        O2_info_3 = np.delete(O2_info_3, -1, 0)
    O2_info = np.concatenate((O2_info_1, O2_info_2, O2_info_3))

elif len(chain_array) == 4:
    cmd.iterate("name O2' and (chain " + chain_array[0] + ")",
               "stored.O2_info_1.append((index, name, elem, resn, resi, chain, b))")
    cmd.iterate("name O2' and (chain " + chain_array[1] + ")",
               "stored.O2_info_2.append((index, name, elem, resn, resi, chain, b))")
    cmd.iterate("name O2' and (chain " + chain_array[2] + ")",
               "stored.O2_info_3.append((index, name, elem, resn, resi, chain, b))")
    cmd.iterate("name O2' and (chain " + chain_array[3] + ")",
               "stored.O2_info_4.append((index, name, elem, resn, resi, chain, b))")
    cmd.iterate("name C2' and (chain " + chain_array[0] + ")",
               "stored.C2_info_1.append((index, name, elem, resn, resi, chain, b))")
    cmd.iterate("name C2' and (chain " + chain_array[1] + ")",
               "stored.C2_info_2.append((index, name, elem, resn, resi, chain, b))")
    cmd.iterate("name C2' and (chain " + chain_array[2] + ")",
               "stored.C2_info_3.append((index, name, elem, resn, resi, chain, b))")
    cmd.iterate("name C2' and (chain " + chain_array[3] + ")",

```

```

        "stored.C2_info_4.append((index, name, elem, resn, resi, chain, b))")
O2_info_1 = np.array(stored.O2_info_1)
O2_info_2 = np.array(stored.O2_info_2)
O2_info_3 = np.array(stored.O2_info_3)
O2_info_4 = np.array(stored.O2_info_4)
C2_info_1 = np.array(stored.C2_info_1)
C2_info_2 = np.array(stored.C2_info_2)
C2_info_3 = np.array(stored.C2_info_3)
C2_info_4 = np.array(stored.C2_info_4)

# Removes the last O2' if it resides on the last residue
if C2_info_1[-1][4] == O2_info_1[-1][4] and C2_info_1[-1][5] == O2_info_1[-1][5]:
    O2_info_1 = np.delete(O2_info_1, -1, 0)
if C2_info_2[-1][4] == O2_info_2[-1][4] and C2_info_2[-1][5] == O2_info_2[-1][5]:
    O2_info_2 = np.delete(O2_info_2, -1, 0)
if C2_info_3[-1][4] == O2_info_3[-1][4] and C2_info_3[-1][5] == O2_info_3[-1][5]:
    O2_info_3 = np.delete(O2_info_3, -1, 0)
if C2_info_4[-1][4] == O2_info_4[-1][4] and C2_info_4[-1][5] == O2_info_4[-1][5]:
    O2_info_4 = np.delete(O2_info_4, -1, 0)
O2_info = np.concatenate((O2_info_1, O2_info_2, O2_info_3, O2_info_4))

elif len(chain_array) == 5:
    cmd.iterate("name O2' and (chain " + chain_array[0] + ")",
               "stored.O2_info_1.append((index, name, elem, resn, resi, chain, b))")
    cmd.iterate("name O2' and (chain " + chain_array[1] + ")",
               "stored.O2_info_2.append((index, name, elem, resn, resi, chain, b))")
    cmd.iterate("name O2' and (chain " + chain_array[2] + ")",
               "stored.O2_info_3.append((index, name, elem, resn, resi, chain, b))")
    cmd.iterate("name O2' and (chain " + chain_array[3] + ")",
               "stored.O2_info_4.append((index, name, elem, resn, resi, chain, b))")
    cmd.iterate("name O2' and (chain " + chain_array[4] + ")",
               "stored.O2_info_5.append((index, name, elem, resn, resi, chain, b))")
    cmd.iterate("name C2' and (chain " + chain_array[0] + ")",
               "stored.C2_info_1.append((index, name, elem, resn, resi, chain, b))")
    cmd.iterate("name C2' and (chain " + chain_array[1] + ")",
               "stored.C2_info_2.append((index, name, elem, resn, resi, chain, b))")
    cmd.iterate("name C2' and (chain " + chain_array[2] + ")",
               "stored.C2_info_3.append((index, name, elem, resn, resi, chain, b))")
    cmd.iterate("name C2' and (chain " + chain_array[3] + ")",
               "stored.C2_info_4.append((index, name, elem, resn, resi, chain, b))")
    cmd.iterate("name C2' and (chain " + chain_array[4] + ")",
               "stored.C2_info_5.append((index, name, elem, resn, resi, chain, b))")
    O2_info_1 = np.array(stored.O2_info_1)
    O2_info_2 = np.array(stored.O2_info_2)
    O2_info_3 = np.array(stored.O2_info_3)
    O2_info_4 = np.array(stored.O2_info_4)

```

```

O2_info_5 = np.array(stored.O2_info_5)
C2_info_1 = np.array(stored.C2_info_1)
C2_info_2 = np.array(stored.C2_info_2)
C2_info_3 = np.array(stored.C2_info_3)
C2_info_4 = np.array(stored.C2_info_4)
C2_info_5 = np.array(stored.C2_info_5)

# Removes the last O2' if it resides on the last residue
if C2_info_1[-1][4] == O2_info_1[-1][4] and C2_info_1[-1][5] == O2_info_1[-1][5]:
    O2_info_1 = np.delete(O2_info_1, -1, 0)
if C2_info_2[-1][4] == O2_info_2[-1][4] and C2_info_2[-1][5] == O2_info_2[-1][5]:
    O2_info_2 = np.delete(O2_info_2, -1, 0)
if C2_info_3[-1][4] == O2_info_3[-1][4] and C2_info_3[-1][5] == O2_info_3[-1][5]:
    O2_info_3 = np.delete(O2_info_3, -1, 0)
if C2_info_4[-1][4] == O2_info_4[-1][4] and C2_info_4[-1][5] == O2_info_4[-1][5]:
    O2_info_4 = np.delete(O2_info_4, -1, 0)
if C2_info_5[-1][4] == O2_info_5[-1][4] and C2_info_5[-1][5] == O2_info_5[-1][5]:
    O2_info_5 = np.delete(O2_info_5, -1, 0)
O2_info = np.concatenate((O2_info_1, O2_info_2, O2_info_3, O2_info_4, O2_info_5))

else:
    print("ERROR: This plugin cannot handle more than 5 chains.")
    return

# Create a file to write non scissile phosphate data to
with open(directory + "\\%s.txt" % (pdb + " Non-Scissile Phosphate O2' Contacts"), "w") as
f_non_scissile:

    # Creates a header
    f_non_scissile.write("***%s Contacts***\n" % (pdb + " Non-Scissile Phosphate O2'
Contacts"))
    f_non_scissile.write("aoiResi" + '\t' + "aoiAtom" + '\t' + "caIndex" + '\t' + "caAtom" + '\t' +
"caResi" + '\t'
        + "caChain" + '\t' + "Dist" + '\n')

    # If an amino was found, determines the distances of CAs to the amino and writes them to a
separate text file
    for a in range(len(amino_info)):

        # Give a default chain letter of Z if no chain letter was previously assigned
        if len(amino_info[a][5]) < 1:
            amino_info[a][5] = 'Z'

        # Find and stores all contacts within 5 angstroms of the amino
        stored.CA_info = []

```

```

    cmd.iterate(("all within 5 of index " + str(amino_info[a][0])),
"stored.CA_info.append((index, name, elem, "
                                "resn, resi, chain, b)))"
    CA_info = np.array(stored.CA_info)

    for b in range(len(CA_info)):
        if len(CA_info[b][5]) < 1:
            CA_info[b][5] = 'Z'

    with open(directory + "\\%s.txt" % (pdb + " Scissile Phosphate O2' Contacts"), "w") as
f_scissile:

        f_scissile.write("***%s Contacts***\n" % (pdb + " Scissile Phosphate O2' Contacts"))
        f_scissile.write("aoiResi" + '\t' + "aoiAtom" + '\t' + "caIndex" + '\t' + "caAtom" + '\t' +
"caResi" +
                                '\t' + "caChain" + '\t' + "Dist" + '\n')

        for b in range(len(CA_info)):
            dist = cmd.distance(("index %s" % amino_info[a][0]), ("index %s" %
CA_info[b][0]))

            f_scissile.write(amino_info[a][3] + amino_info[a][4] + '\t' + amino_info[a][1] + '\t' +
str(CA_info[b][0]) + '\t' + CA_info[b][1] + '\t' + CA_info[b][3] +
CA_info[b][4] +
                                '\t' + CA_info[b][5] + '\t' + str(dist) + '\n')

    # Iterates through all the stored O2's
    for a in range(len(O2_info)):

        if len(O2_info[a][5]) < 1:
            O2_info[a][5] = 'Z'

        # Find and stores all contacts within 5 angstroms of each O2'
        stored.CA_info = []
        cmd.iterate(("all within 5 of index " + str(O2_info[a][0])),
"stored.CA_info.append((index, name, elem, "
                                "resn, resi, chain, b)))"
        CA_info = np.array(stored.CA_info)

        for b in range(len(CA_info)):
            if len(CA_info[b][5]) < 1:
                CA_info[b][5] = 'Z'

        # Determines the CA distances to the O2' at the scissile phosphate and writes them to a
separate text file

```

```

        if O2_info[a][4] == minus_one_nucleotide and (O2_info[a][5] == chain_array[0] or
chain_array[0] == 'NONE'):
            with open(directory + '\\%s.txt' % (pdb + " Scissile Phosphate O2' Contacts"), "w") as
f_scissile:

                f_scissile.write("***%s Contacts***\n" % (pdb + " Scissile Phosphate O2'
Contacts"))
                f_scissile.write("aoiResi" + '\t' + "aoiAtom" + '\t' + "caIndex" + '\t' + "caAtom" + '\t'
+ "caResi"
                    + '\t' + "caChain" + '\t' + "Dist" + '\n')

                for b in range(len(CA_info)):
                    dist = cmd.distance(("index %s" % O2_info[a][0]), ("index %s" %
CA_info[b][0]))

                    f_scissile.write(O2_info[a][3] + O2_info[a][4] + '\t' + O2_info[a][1] + '\t' +
str(CA_info[b][0]) + '\t' + CA_info[b][1] + '\t' + CA_info[b][3] +
CA_info[b][4] + '\t' + CA_info[b][5] + '\t' + str(dist) + '\n')

                continue

            # Determines the CA distances to the O2' and writes them to the non-scissile text file
for b in range(len(CA_info)):
                dist = cmd.distance(("index %s" % O2_info[a][0]), ("index %s" % CA_info[b][0]))

                f_non_scissile.write(O2_info[a][3] + O2_info[a][4] + '\t' + O2_info[a][1] + '\t' +
str(CA_info[b][0]) +
                    '\t' + CA_info[b][1] + '\t' + CA_info[b][3] + CA_info[b][4] + '\t' +
CA_info[b][5]
                    + '\t' + str(dist) + '\n')

            # Deletes all distance objects in PyMOL to prevent PyMOL from crashing by storing too
many objects
            cmd.delete("dist*")

            print("O2' Data Collection Complete")

def find_NBO_CA(plus_one_nucleotide, chain_array):

    stored.pdb = ""
    cmd.iterate("index 1", "stored.pdb = model")
    pdb = stored.pdb

    stored.OP1_info_1 = []
    stored.OP1_info_2 = []
    stored.OP1_info_3 = []

```

```

stored.OP1_info_4 = []
stored.OP1_info_5 = []
stored.C2_info_1 = []
stored.C2_info_2 = []
stored.C2_info_3 = []
stored.C2_info_4 = []
stored.C2_info_5 = []

# Generates list(s) of all OP1s within each nucleotide linkage for the chains specified by the
user
if chain_array[0] == 'NONE':
    cmd.iterate("name OP1",
                "stored.OP1_info_1.append((index, name, elem, resn, resi, chain, b))")
    cmd.iterate("name C2'",
                "stored.C2_info_1.append((index, name, elem, resn, resi, chain, b))")
    OP1_info_1 = np.array(stored.OP1_info_1)
    C2_info_1 = np.array(stored.C2_info_1)

    # Removes the first OP1 if it resides on the first residue
    while C2_info_1[0][4] == OP1_info_1[0][4] and C2_info_1[0][5] == OP1_info_1[0][5]:
        OP1_info_1 = np.delete(OP1_info_1, 0, 0)
    OP1_info = OP1_info_1

elif len(chain_array) == 1:
    cmd.iterate("name OP1 and (chain " + chain_array[0] + ")",
                "stored.OP1_info_1.append((index, name, elem, resn, resi, chain, b))")
    cmd.iterate("name C2' and (chain " + chain_array[0] + ")",
                "stored.C2_info_1.append((index, name, elem, resn, resi, chain, b))")
    OP1_info_1 = np.array(stored.OP1_info_1)
    C2_info_1 = np.array(stored.C2_info_1)

    # Removes the first OP1 if it resides on the first residue
    while C2_info_1[0][4] == OP1_info_1[0][4] and C2_info_1[0][5] == OP1_info_1[0][5]:
        OP1_info_1 = np.delete(OP1_info_1, 0, 0)
    OP1_info = OP1_info_1

elif len(chain_array) == 2:
    cmd.iterate("name OP1 and (chain " + chain_array[0] + ")",
                "stored.OP1_info_1.append((index, name, elem, resn, resi, chain, b))")
    cmd.iterate("name OP1 and (chain " + chain_array[1] + ")",
                "stored.OP1_info_2.append((index, name, elem, resn, resi, chain, b))")
    cmd.iterate("name C2' and (chain " + chain_array[0] + ")",
                "stored.C2_info_1.append((index, name, elem, resn, resi, chain, b))")
    cmd.iterate("name C2' and (chain " + chain_array[1] + ")",
                "stored.C2_info_2.append((index, name, elem, resn, resi, chain, b))")
    OP1_info_1 = np.array(stored.OP1_info_1)

```

```

OP1_info_2 = np.array(stored.OP1_info_2)
C2_info_1 = np.array(stored.C2_info_1)
C2_info_2 = np.array(stored.C2_info_2)

# Removes the first OP1 if it resides on the first residue
while C2_info_1[0][4] == OP1_info_1[0][4] and C2_info_1[0][5] == OP1_info_1[0][5]:
    OP1_info_1 = np.delete(OP1_info_1, 0, 0)
while C2_info_2[0][4] == OP1_info_2[0][4] and C2_info_2[0][5] == OP1_info_2[0][5]:
    OP1_info_2 = np.delete(OP1_info_2, 0, 0)
OP1_info = np.concatenate((OP1_info_1, OP1_info_2))

elif len(chain_array) == 3:
    cmd.iterate("name OP1 and (chain " + chain_array[0] + ")",
               "stored.OP1_info_1.append((index, name, elem, resn, resi, chain, b))")
    cmd.iterate("name OP1 and (chain " + chain_array[1] + ")",
               "stored.OP1_info_2.append((index, name, elem, resn, resi, chain, b))")
    cmd.iterate("name OP1 and (chain " + chain_array[2] + ")",
               "stored.OP1_info_3.append((index, name, elem, resn, resi, chain, b))")
    cmd.iterate("name C2' and (chain " + chain_array[0] + ")",
               "stored.C2_info_1.append((index, name, elem, resn, resi, chain, b))")
    cmd.iterate("name C2' and (chain " + chain_array[1] + ")",
               "stored.C2_info_2.append((index, name, elem, resn, resi, chain, b))")
    cmd.iterate("name C2' and (chain " + chain_array[2] + ")",
               "stored.C2_info_3.append((index, name, elem, resn, resi, chain, b))")
    OP1_info_1 = np.array(stored.OP1_info_1)
    OP1_info_2 = np.array(stored.OP1_info_2)
    OP1_info_3 = np.array(stored.OP1_info_3)
    C2_info_1 = np.array(stored.C2_info_1)
    C2_info_2 = np.array(stored.C2_info_2)
    C2_info_3 = np.array(stored.C2_info_3)

# Removes the first OP1 if it resides on the first residue
while C2_info_1[0][4] == OP1_info_1[0][4] and C2_info_1[0][5] == OP1_info_1[0][5]:
    OP1_info_1 = np.delete(OP1_info_1, 0, 0)
while C2_info_2[0][4] == OP1_info_2[0][4] and C2_info_2[0][5] == OP1_info_2[0][5]:
    OP1_info_2 = np.delete(OP1_info_2, 0, 0)
while C2_info_3[0][4] == OP1_info_3[0][4] and C2_info_3[0][5] == OP1_info_3[0][5]:
    OP1_info_3 = np.delete(OP1_info_3, 0, 0)
OP1_info = np.concatenate((OP1_info_1, OP1_info_2, OP1_info_3))

elif len(chain_array) == 4:
    cmd.iterate("name OP1 and (chain " + chain_array[0] + ")",
               "stored.OP1_info_1.append((index, name, elem, resn, resi, chain, b))")
    cmd.iterate("name OP1 and (chain " + chain_array[1] + ")",
               "stored.OP1_info_2.append((index, name, elem, resn, resi, chain, b))")
    cmd.iterate("name OP1 and (chain " + chain_array[2] + ")",

```

```

        "stored.OP1_info_3.append((index, name, elem, resn, resi, chain, b))")
cmd.iterate("name OP1 and (chain " + chain_array[3] + ")",
        "stored.OP1_info_4.append((index, name, elem, resn, resi, chain, b))")
cmd.iterate("name C2' and (chain " + chain_array[0] + ")",
        "stored.C2_info_1.append((index, name, elem, resn, resi, chain, b))")
cmd.iterate("name C2' and (chain " + chain_array[1] + ")",
        "stored.C2_info_2.append((index, name, elem, resn, resi, chain, b))")
cmd.iterate("name C2' and (chain " + chain_array[2] + ")",
        "stored.C2_info_3.append((index, name, elem, resn, resi, chain, b))")
cmd.iterate("name C2' and (chain " + chain_array[3] + ")",
        "stored.C2_info_4.append((index, name, elem, resn, resi, chain, b))")
OP1_info_1 = np.array(stored.OP1_info_1)
OP1_info_2 = np.array(stored.OP1_info_2)
OP1_info_3 = np.array(stored.OP1_info_3)
OP1_info_4 = np.array(stored.OP1_info_4)
C2_info_1 = np.array(stored.C2_info_1)
C2_info_2 = np.array(stored.C2_info_2)
C2_info_3 = np.array(stored.C2_info_3)
C2_info_4 = np.array(stored.C2_info_4)

# Removes the first OP1 if it resides on the first residue
while C2_info_1[0][4] == OP1_info_1[0][4] and C2_info_1[0][5] == OP1_info_1[0][5]:
    OP1_info_1 = np.delete(OP1_info_1, 0, 0)
while C2_info_2[0][4] == OP1_info_2[0][4] and C2_info_2[0][5] == OP1_info_2[0][5]:
    OP1_info_2 = np.delete(OP1_info_2, 0, 0)
while C2_info_3[0][4] == OP1_info_3[0][4] and C2_info_3[0][5] == OP1_info_3[0][5]:
    OP1_info_3 = np.delete(OP1_info_3, 0, 0)
while C2_info_4[0][4] == OP1_info_4[0][4] and C2_info_4[0][5] == OP1_info_4[0][5]:
    OP1_info_4 = np.delete(OP1_info_4, 0, 0)
OP1_info = np.concatenate((OP1_info_1, OP1_info_2, OP1_info_3, OP1_info_4))

elif len(chain_array) == 5:
cmd.iterate("name OP1 and (chain " + chain_array[0] + ")",
        "stored.OP1_info_1.append((index, name, elem, resn, resi, chain, b))")
cmd.iterate("name OP1 and (chain " + chain_array[1] + ")",
        "stored.OP1_info_2.append((index, name, elem, resn, resi, chain, b))")
cmd.iterate("name OP1 and (chain " + chain_array[2] + ")",
        "stored.OP1_info_3.append((index, name, elem, resn, resi, chain, b))")
cmd.iterate("name OP1 and (chain " + chain_array[3] + ")",
        "stored.OP1_info_4.append((index, name, elem, resn, resi, chain, b))")
cmd.iterate("name OP1 and (chain " + chain_array[4] + ")",
        "stored.OP1_info_5.append((index, name, elem, resn, resi, chain, b))")
cmd.iterate("name C2' and (chain " + chain_array[0] + ")",
        "stored.C2_info_1.append((index, name, elem, resn, resi, chain, b))")
cmd.iterate("name C2' and (chain " + chain_array[1] + ")",
        "stored.C2_info_2.append((index, name, elem, resn, resi, chain, b))")

```



```

cmd.iterate("name C2' and (chain " + chain_array[2] + ")",
           "stored.C2_info_3.append((index, name, elem, resn, resi, chain, b))")
cmd.iterate("name C2' and (chain " + chain_array[3] + ")",
           "stored.C2_info_4.append((index, name, elem, resn, resi, chain, b))")
cmd.iterate("name C2' and (chain " + chain_array[4] + ")",
           "stored.C2_info_5.append((index, name, elem, resn, resi, chain, b))")
OP1_info_1 = np.array(stored.OP1_info_1)
OP1_info_2 = np.array(stored.OP1_info_2)
OP1_info_3 = np.array(stored.OP1_info_3)
OP1_info_4 = np.array(stored.OP1_info_4)
OP1_info_5 = np.array(stored.OP1_info_5)
C2_info_1 = np.array(stored.C2_info_1)
C2_info_2 = np.array(stored.C2_info_2)
C2_info_3 = np.array(stored.C2_info_3)
C2_info_4 = np.array(stored.C2_info_4)
C2_info_5 = np.array(stored.C2_info_5)

# Removes the first OP1 if it resides on the first residue
if C2_info_1[0][4] == OP1_info_1[0][4] and C2_info_1[0][5] == OP1_info_1[0][5]:
    OP1_info_1 = np.delete(OP1_info_1, 0, 0)
if C2_info_2[0][4] == OP1_info_2[0][4] and C2_info_2[0][5] == OP1_info_2[0][5]:
    OP1_info_2 = np.delete(OP1_info_2, 0, 0)
if C2_info_3[0][4] == OP1_info_3[0][4] and C2_info_3[0][5] == OP1_info_3[0][5]:
    OP1_info_3 = np.delete(OP1_info_3, 0, 0)
if C2_info_4[0][4] == OP1_info_4[0][4] and C2_info_4[0][5] == OP1_info_4[0][5]:
    OP1_info_4 = np.delete(OP1_info_4, 0, 0)
if C2_info_5[0][4] == OP1_info_5[0][4] and C2_info_5[0][5] == OP1_info_5[0][5]:
    OP1_info_5 = np.delete(OP1_info_5, 0, 0)
OP1_info = np.concatenate((OP1_info_1, OP1_info_2, OP1_info_3, OP1_info_4,
OP1_info_5))

else:
    print("ERROR: This plugin cannot handle more than 5 chains.")
    return

stored.OP2_info_1 = []
stored.OP2_info_2 = []
stored.OP2_info_3 = []
stored.OP2_info_4 = []
stored.OP2_info_5 = []
stored.C2_info_1 = []
stored.C2_info_2 = []
stored.C2_info_3 = []
stored.C2_info_4 = []
stored.C2_info_5 = []

```

```

# Generates list(s) of all OP2s within each nucleotide linkage for the chains specified by the
user
if chain_array[0] == 'NONE':
    cmd.iterate("name OP2",
               "stored.OP2_info_1.append((index, name, elem, resn, resi, chain, b))")
    cmd.iterate("name C2'",
               "stored.C2_info_1.append((index, name, elem, resn, resi, chain, b))")
    OP2_info_1 = np.array(stored.OP2_info_1)
    C2_info_1 = np.array(stored.C2_info_1)

# Removes the first OP2 if it resides on the first residue
while C2_info_1[0][4] == OP2_info_1[0][4] and C2_info_1[0][5] == OP2_info_1[0][5]:
    OP2_info_1 = np.delete(OP2_info_1, 0, 0)
    OP2_info = OP2_info_1

elif len(chain_array) == 1:
    cmd.iterate("name OP2 and (chain " + chain_array[0] + ")",
               "stored.OP2_info_1.append((index, name, elem, resn, resi, chain, b))")
    cmd.iterate("name C2' and (chain " + chain_array[0] + ")",
               "stored.C2_info_1.append((index, name, elem, resn, resi, chain, b))")
    OP2_info_1 = np.array(stored.OP2_info_1)
    C2_info_1 = np.array(stored.C2_info_1)

# Removes the first OP2 if it resides on the first residue
while C2_info_1[0][4] == OP2_info_1[0][4] and C2_info_1[0][5] == OP2_info_1[0][5]:
    OP2_info_1 = np.delete(OP2_info_1, 0, 0)
    OP2_info = OP2_info_1

elif len(chain_array) == 2:
    cmd.iterate("name OP2 and (chain " + chain_array[0] + ")",
               "stored.OP2_info_1.append((index, name, elem, resn, resi, chain, b))")
    cmd.iterate("name OP2 and (chain " + chain_array[1] + ")",
               "stored.OP2_info_2.append((index, name, elem, resn, resi, chain, b))")
    cmd.iterate("name C2' and (chain " + chain_array[0] + ")",
               "stored.C2_info_1.append((index, name, elem, resn, resi, chain, b))")
    cmd.iterate("name C2' and (chain " + chain_array[1] + ")",
               "stored.C2_info_2.append((index, name, elem, resn, resi, chain, b))")
    OP2_info_1 = np.array(stored.OP2_info_1)
    OP2_info_2 = np.array(stored.OP2_info_2)
    C2_info_1 = np.array(stored.C2_info_1)
    C2_info_2 = np.array(stored.C2_info_2)

# Removes the first OP2 if it resides on the first residue
while C2_info_1[0][4] == OP2_info_1[0][4] and C2_info_1[0][5] == OP2_info_1[0][5]:
    OP2_info_1 = np.delete(OP2_info_1, 0, 0)
    while C2_info_2[0][4] == OP2_info_2[0][4] and C2_info_2[0][5] == OP2_info_2[0][5]:

```

```
OP2_info_2 = np.delete(OP2_info_2, 0, 0)
OP2_info = np.concatenate((OP2_info_1, OP2_info_2))
```

```
elif len(chain_array) == 3:
```

```
cmd.iterate("name OP2 and (chain " + chain_array[0] + ")",
            "stored.OP2_info_1.append((index, name, elem, resn, resi, chain, b))")
cmd.iterate("name OP2 and (chain " + chain_array[1] + ")",
            "stored.OP2_info_2.append((index, name, elem, resn, resi, chain, b))")
cmd.iterate("name OP2 and (chain " + chain_array[2] + ")",
            "stored.OP2_info_3.append((index, name, elem, resn, resi, chain, b))")
cmd.iterate("name C2' and (chain " + chain_array[0] + ")",
            "stored.C2_info_1.append((index, name, elem, resn, resi, chain, b))")
cmd.iterate("name C2' and (chain " + chain_array[1] + ")",
            "stored.C2_info_2.append((index, name, elem, resn, resi, chain, b))")
cmd.iterate("name C2' and (chain " + chain_array[2] + ")",
            "stored.C2_info_3.append((index, name, elem, resn, resi, chain, b))")
OP2_info_1 = np.array(stored.OP2_info_1)
OP2_info_2 = np.array(stored.OP2_info_2)
OP2_info_3 = np.array(stored.OP2_info_3)
C2_info_1 = np.array(stored.C2_info_1)
C2_info_2 = np.array(stored.C2_info_2)
C2_info_3 = np.array(stored.C2_info_3)
```

```
# Removes the first OP2 if it resides on the first residue
```

```
while C2_info_1[0][4] == OP2_info_1[0][4] and C2_info_1[0][5] == OP2_info_1[0][5]:
    OP2_info_1 = np.delete(OP2_info_1, 0, 0)
while C2_info_2[0][4] == OP2_info_2[0][4] and C2_info_2[0][5] == OP2_info_2[0][5]:
    OP2_info_2 = np.delete(OP2_info_2, 0, 0)
while C2_info_3[0][4] == OP2_info_3[0][4] and C2_info_3[0][5] == OP2_info_3[0][5]:
    OP2_info_3 = np.delete(OP2_info_3, 0, 0)
OP2_info = np.concatenate((OP2_info_1, OP2_info_2, OP2_info_3))
```

```
elif len(chain_array) == 4:
```

```
cmd.iterate("name OP2 and (chain " + chain_array[0] + ")",
            "stored.OP2_info_1.append((index, name, elem, resn, resi, chain, b))")
cmd.iterate("name OP2 and (chain " + chain_array[1] + ")",
            "stored.OP2_info_2.append((index, name, elem, resn, resi, chain, b))")
cmd.iterate("name OP2 and (chain " + chain_array[2] + ")",
            "stored.OP2_info_3.append((index, name, elem, resn, resi, chain, b))")
cmd.iterate("name OP2 and (chain " + chain_array[3] + ")",
            "stored.OP2_info_4.append((index, name, elem, resn, resi, chain, b))")
cmd.iterate("name C2' and (chain " + chain_array[0] + ")",
            "stored.C2_info_1.append((index, name, elem, resn, resi, chain, b))")
cmd.iterate("name C2' and (chain " + chain_array[1] + ")",
            "stored.C2_info_2.append((index, name, elem, resn, resi, chain, b))")
cmd.iterate("name C2' and (chain " + chain_array[2] + ")",
```

```

        "stored.C2_info_3.append((index, name, elem, resn, resi, chain, b)))"
cmd.iterate("name C2' and (chain " + chain_array[3] + ") ",
        "stored.C2_info_4.append((index, name, elem, resn, resi, chain, b)))"
OP2_info_1 = np.array(stored.OP2_info_1)
OP2_info_2 = np.array(stored.OP2_info_2)
OP2_info_3 = np.array(stored.OP2_info_3)
OP2_info_4 = np.array(stored.OP2_info_4)
C2_info_1 = np.array(stored.C2_info_1)
C2_info_2 = np.array(stored.C2_info_2)
C2_info_3 = np.array(stored.C2_info_3)
C2_info_4 = np.array(stored.C2_info_4)

# Removes the first OP2 if it resides on the first residue
while C2_info_1[0][4] == OP2_info_1[0][4] and C2_info_1[0][5] == OP2_info_1[0][5]:
    OP2_info_1 = np.delete(OP2_info_1, 0, 0)
while C2_info_2[0][4] == OP2_info_2[0][4] and C2_info_2[0][5] == OP2_info_2[0][5]:
    OP2_info_2 = np.delete(OP2_info_2, 0, 0)
while C2_info_3[0][4] == OP2_info_3[0][4] and C2_info_3[0][5] == OP2_info_3[0][5]:
    OP2_info_3 = np.delete(OP2_info_3, 0, 0)
while C2_info_4[0][4] == OP2_info_4[0][4] and C2_info_4[0][5] == OP2_info_4[0][5]:
    OP2_info_4 = np.delete(OP2_info_4, 0, 0)
OP2_info = np.concatenate((OP2_info_1, OP2_info_2, OP2_info_3, OP2_info_4))

elif len(chain_array) == 5:
    cmd.iterate("name OP2 and (chain " + chain_array[0] + ") ",
        "stored.OP2_info_1.append((index, name, elem, resn, resi, chain, b)))"
    cmd.iterate("name OP2 and (chain " + chain_array[1] + ") ",
        "stored.OP2_info_2.append((index, name, elem, resn, resi, chain, b)))"
    cmd.iterate("name OP2 and (chain " + chain_array[2] + ") ",
        "stored.OP2_info_3.append((index, name, elem, resn, resi, chain, b)))"
    cmd.iterate("name OP2 and (chain " + chain_array[3] + ") ",
        "stored.OP2_info_4.append((index, name, elem, resn, resi, chain, b)))"
    cmd.iterate("name OP2 and (chain " + chain_array[4] + ") ",
        "stored.OP2_info_5.append((index, name, elem, resn, resi, chain, b)))"
    cmd.iterate("name C2' and (chain " + chain_array[0] + ") ",
        "stored.C2_info_1.append((index, name, elem, resn, resi, chain, b)))"
    cmd.iterate("name C2' and (chain " + chain_array[1] + ") ",
        "stored.C2_info_2.append((index, name, elem, resn, resi, chain, b)))"
    cmd.iterate("name C2' and (chain " + chain_array[2] + ") ",
        "stored.C2_info_3.append((index, name, elem, resn, resi, chain, b)))"
    cmd.iterate("name C2' and (chain " + chain_array[3] + ") ",
        "stored.C2_info_4.append((index, name, elem, resn, resi, chain, b)))"
    cmd.iterate("name C2' and (chain " + chain_array[4] + ") ",
        "stored.C2_info_5.append((index, name, elem, resn, resi, chain, b)))"
    OP2_info_1 = np.array(stored.OP2_info_1)
    OP2_info_2 = np.array(stored.OP2_info_2)

```

```

OP2_info_3 = np.array(stored.OP2_info_3)
OP2_info_4 = np.array(stored.OP2_info_4)
OP2_info_5 = np.array(stored.OP2_info_5)
C2_info_1 = np.array(stored.C2_info_1)
C2_info_2 = np.array(stored.C2_info_2)
C2_info_3 = np.array(stored.C2_info_3)
C2_info_4 = np.array(stored.C2_info_4)
C2_info_5 = np.array(stored.C2_info_5)

# Removes the first OP2 if it resides on the first residue
if C2_info_1[0][4] == OP2_info_1[0][4] and C2_info_1[0][5] == OP2_info_1[0][5]:
    OP2_info_1 = np.delete(OP2_info_1, 0, 0)
if C2_info_2[0][4] == OP2_info_2[0][4] and C2_info_2[0][5] == OP2_info_2[0][5]:
    OP2_info_2 = np.delete(OP2_info_2, 0, 0)
if C2_info_3[0][4] == OP2_info_3[0][4] and C2_info_3[0][5] == OP2_info_3[0][5]:
    OP2_info_3 = np.delete(OP2_info_3, 0, 0)
if C2_info_4[0][4] == OP2_info_4[0][4] and C2_info_4[0][5] == OP2_info_4[0][5]:
    OP2_info_4 = np.delete(OP2_info_4, 0, 0)
if C2_info_5[0][4] == OP2_info_5[0][4] and C2_info_5[0][5] == OP2_info_5[0][5]:
    OP2_info_5 = np.delete(OP2_info_5, 0, 0)
OP2_info = np.concatenate((OP2_info_1, OP2_info_2, OP2_info_3, OP2_info_4,
OP2_info_5))

else:
    print("ERROR: This plugin cannot handle more than 5 chains.")
    return

# Create a file to write non scissile phosphate data to
with open(directory + "\\%s.txt" % (pdb + " Non-Scissile Phosphate NBO Contacts"), "w") as
f_non_scissile:

    # Creates a header
    f_non_scissile.write("****%s Contacts****\n" % (pdb + " Non-Scissile Phosphate NBO
Contacts"))
    f_non_scissile.write("aoiResi" + '\t' + "aoiAtom" + '\t' + "caIndex" + '\t' + "caAtom" + '\t' +
"caResi" + '\t'
        + "caChain" + '\t' + "Dist" + '\n')

# Create a file to write scissile phosphate data to
f_scissile = open(directory + "\\%s.txt" % (pdb + " Scissile Phosphate NBO Contacts"), "w")

# Creates a header
f_scissile.write("****%s Contacts****\n" % (pdb + " Scissile Phosphate NBO Contacts"))
f_scissile.write("aoiResi" + '\t' + "aoiAtom" + '\t' + "caIndex" + '\t' + "caAtom" + '\t' +
"caResi" + '\t' +
    "caChain" + '\t' + "Dist" + '\n')

```

```

# Iterates through all the stored OP1s
for a in range(len(OP1_info)):

    # Give a default chain letter of Z if no chain letter was previously assigned
    if len(OP1_info[a][5]) < 1:
        OP1_info[a][5] = 'Z'

    # Find and stores all contacts within 5 angstroms of each OP1
    stored.CA_info = []
    cmd.iterate(("all within 5 of index " + str(OP1_info[a][0])),
"stored.CA_info.append((index, name, elem, "
                                "resn, resi, chain, b))")

    CA_info = np.array(stored.CA_info)

    for b in range(len(CA_info)):
        if len(CA_info[b][5]) < 1:
            CA_info[b][5] = 'Z'

    # Determines the CA distances to the OP1 at the scissile phosphate and writes them to the
    scissile phosphate
    # text file
    if OP1_info[a][4] == plus_one_nucleotide and (OP1_info[a][5] == chain_array[0] or
chain_array[0] == 'NONE'):

        for b in range(len(CA_info)):
            dist = cmd.distance(("index %s" % OP1_info[a][0]), ("index %s" % CA_info[b][0]))

            f_scissile.write(OP1_info[a][3] + OP1_info[a][4] + '\t' + OP1_info[a][1] + '\t' +
str(CA_info[b][0])
                + '\t' + CA_info[b][1] + '\t' + CA_info[b][3] + CA_info[b][4] + '\t' +
CA_info[b][5] + '\t' + str(dist) + '\n')

        continue

    # Determines the CA distances to the OP1 and writes them to the non-scissile text file
    for b in range(len(CA_info)):
        dist = cmd.distance(("index %s" % OP1_info[a][0]), ("index %s" % CA_info[b][0]))

        f_non_scissile.write(OP1_info[a][3] + OP1_info[a][4] + '\t' + OP1_info[a][1] + '\t' +
str(CA_info[b][0])
                + '\t' + CA_info[b][1] + '\t' + CA_info[b][3] + CA_info[b][4] + '\t' +
CA_info[b][5] + '\t' + str(dist) + '\n')

    # Deletes all distance objects in PyMOL to prevent PyMOL from crashing by storing too
    many objects

```

```

cmd.delete("dist*")

# Iterates through all the stored OP2s
for a in range(len(OP2_info)):

    # Give a default chain letter of Z if no chain letter was previously assigned
    if len(OP2_info[a][5]) < 1:
        OP2_info[a][5] = 'Z'

    # Find and stores all contacts within 5 angstroms of each OP2
    stored.CA_info = []
    cmd.iterate(("all within 5 of index " + str(OP2_info[a][0])),
"stored.CA_info.append((index, name, elem, "
                                "resn, resi, chain, b))")
    CA_info = np.array(stored.CA_info)

    for b in range(len(CA_info)):
        if len(CA_info[b][5]) < 1:
            CA_info[b][5] = 'Z'

    # Determines the CA distances to the OP2 at the scissile phosphate and writes them to the
    scissile phosphate
    # text file
    if OP2_info[a][4] == plus_one_nucleotide and (OP2_info[a][5] == chain_array[0] or
chain_array[0] == 'NONE'):

        for b in range(len(CA_info)):
            dist = cmd.distance(("index %s" % OP2_info[a][0]), ("index %s" % CA_info[b][0]))

            f_scissile.write(OP2_info[a][3] + OP2_info[a][4] + '\t' + OP2_info[a][1] + '\t' +
str(CA_info[b][0])
                + '\t' + CA_info[b][1] + '\t' + CA_info[b][3] + CA_info[b][4] + '\t' +
CA_info[b][5] + '\t' + str(dist) + '\n')

        continue

    # Determines the CA distances to the OP2 and writes them to the non-scissile text file
    for b in range(len(CA_info)):
        dist = cmd.distance(("index %s" % OP2_info[a][0]), ("index %s" % CA_info[b][0]))

        f_non_scissile.write(OP2_info[a][3] + OP2_info[a][4] + '\t' + OP2_info[a][1] + '\t' +
str(CA_info[b][0])
                + '\t' + CA_info[b][1] + '\t' + CA_info[b][3] + CA_info[b][4] + '\t' +
CA_info[b][5] + '\t' + str(dist) + '\n')

```

```
# Deletes all distance objects in PyMOL to prevent PyMOL from crashing by storing too many objects
```

```
cmd.delete("dist*")
```

```
f_scissile.close()
```

```
print("NBO Data Collection Complete")
```

```
def find_O5_CA(plus_one_nucleotide, chain_array):
```

```
    stored.pdb = ""
```

```
    cmd.iterate("index 1", "stored.pdb = model")
```

```
    pdb = stored.pdb
```

```
    stored.O5_info_1 = []
```

```
    stored.O5_info_2 = []
```

```
    stored.O5_info_3 = []
```

```
    stored.O5_info_4 = []
```

```
    stored.O5_info_5 = []
```

```
    stored.C2_info_1 = []
```

```
    stored.C2_info_2 = []
```

```
    stored.C2_info_3 = []
```

```
    stored.C2_info_4 = []
```

```
    stored.C2_info_5 = []
```

```
# Generates list(s) of all O5's within each nucleotide linkage for the chains specified by the user
```

```
if chain_array[0] == 'NONE':
```

```
    cmd.iterate("name O5",
```

```
                "stored.O5_info_1.append((index, name, elem, resn, resi, chain, b))")
```

```
    cmd.iterate("name C2",
```

```
                "stored.C2_info_1.append((index, name, elem, resn, resi, chain, b))")
```

```
    O5_info_1 = np.array(stored.O5_info_1)
```

```
    C2_info_1 = np.array(stored.C2_info_1)
```

```
# Removes the first O5' if it resides on the first residue
```

```
if C2_info_1[0][4] == O5_info_1[0][4] and C2_info_1[0][5] == O5_info_1[0][5]:
```

```
    O5_info_1 = np.delete(O5_info_1, 0, 0)
```

```
O5_info = O5_info_1
```

```
elif len(chain_array) == 1:
```

```
    cmd.iterate("name O5' and (chain " + chain_array[0] + ")",
```

```
                "stored.O5_info_1.append((index, name, elem, resn, resi, chain, b))")
```

```
    cmd.iterate("name C2' and (chain " + chain_array[0] + ")",
```

```
                "stored.C2_info_1.append((index, name, elem, resn, resi, chain, b))")
```

```
    O5_info_1 = np.array(stored.O5_info_1)
```



```

C2_info_1 = np.array(stored.C2_info_1)

# Removes the first O5' if it resides on the first residue
if C2_info_1[0][4] == O5_info_1[0][4] and C2_info_1[0][5] == O5_info_1[0][5]:
    O5_info_1 = np.delete(O5_info_1, 0, 0)
O5_info = O5_info_1

elif len(chain_array) == 2:
    cmd.iterate("name O5' and (chain " + chain_array[0] + ")",
               "stored.O5_info_1.append((index, name, elem, resn, resi, chain, b))")
    cmd.iterate("name O5' and (chain " + chain_array[1] + ")",
               "stored.O5_info_2.append((index, name, elem, resn, resi, chain, b))")
    cmd.iterate("name C2' and (chain " + chain_array[0] + ")",
               "stored.C2_info_1.append((index, name, elem, resn, resi, chain, b))")
    cmd.iterate("name C2' and (chain " + chain_array[1] + ")",
               "stored.C2_info_2.append((index, name, elem, resn, resi, chain, b))")
    O5_info_1 = np.array(stored.O5_info_1)
    O5_info_2 = np.array(stored.O5_info_2)
    C2_info_1 = np.array(stored.C2_info_1)
    C2_info_2 = np.array(stored.C2_info_2)

# Removes the first O5' if it resides on the first residue
if C2_info_1[0][4] == O5_info_1[0][4] and C2_info_1[0][5] == O5_info_1[0][5]:
    O5_info_1 = np.delete(O5_info_1, 0, 0)
if C2_info_2[0][4] == O5_info_2[0][4] and C2_info_2[0][5] == O5_info_2[0][5]:
    O5_info_2 = np.delete(O5_info_2, 0, 0)
O5_info = np.concatenate((O5_info_1, O5_info_2))

elif len(chain_array) == 3:
    cmd.iterate("name O5' and (chain " + chain_array[0] + ")",
               "stored.O5_info_1.append((index, name, elem, resn, resi, chain, b))")
    cmd.iterate("name O5' and (chain " + chain_array[1] + ")",
               "stored.O5_info_2.append((index, name, elem, resn, resi, chain, b))")
    cmd.iterate("name O5' and (chain " + chain_array[2] + ")",
               "stored.O5_info_3.append((index, name, elem, resn, resi, chain, b))")
    cmd.iterate("name C2' and (chain " + chain_array[0] + ")",
               "stored.C2_info_1.append((index, name, elem, resn, resi, chain, b))")
    cmd.iterate("name C2' and (chain " + chain_array[1] + ")",
               "stored.C2_info_2.append((index, name, elem, resn, resi, chain, b))")
    cmd.iterate("name C2' and (chain " + chain_array[2] + ")",
               "stored.C2_info_3.append((index, name, elem, resn, resi, chain, b))")
    O5_info_1 = np.array(stored.O5_info_1)
    O5_info_2 = np.array(stored.O5_info_2)
    O5_info_3 = np.array(stored.O5_info_3)
    C2_info_1 = np.array(stored.C2_info_1)
    C2_info_2 = np.array(stored.C2_info_2)

```

```

C2_info_3 = np.array(stored.C2_info_3)

# Removes the first O5' if it resides on the first residue
if C2_info_1[0][4] == O5_info_1[0][4] and C2_info_1[0][5] == O5_info_1[0][5]:
    O5_info_1 = np.delete(O5_info_1, 0, 0)
if C2_info_2[0][4] == O5_info_2[0][4] and C2_info_2[0][5] == O5_info_2[0][5]:
    O5_info_2 = np.delete(O5_info_2, 0, 0)
if C2_info_3[0][4] == O5_info_3[0][4] and C2_info_3[0][5] == O5_info_3[0][5]:
    O5_info_3 = np.delete(O5_info_3, 0, 0)
O5_info = np.concatenate((O5_info_1, O5_info_2, O5_info_3))

elif len(chain_array) == 4:
    cmd.iterate("name O5' and (chain " + chain_array[0] + ")",
               "stored.O5_info_1.append((index, name, elem, resn, resi, chain, b))")
    cmd.iterate("name O5' and (chain " + chain_array[1] + ")",
               "stored.O5_info_2.append((index, name, elem, resn, resi, chain, b))")
    cmd.iterate("name O5' and (chain " + chain_array[2] + ")",
               "stored.O5_info_3.append((index, name, elem, resn, resi, chain, b))")
    cmd.iterate("name O5' and (chain " + chain_array[3] + ")",
               "stored.O5_info_4.append((index, name, elem, resn, resi, chain, b))")
    cmd.iterate("name C2' and (chain " + chain_array[0] + ")",
               "stored.C2_info_1.append((index, name, elem, resn, resi, chain, b))")
    cmd.iterate("name C2' and (chain " + chain_array[1] + ")",
               "stored.C2_info_2.append((index, name, elem, resn, resi, chain, b))")
    cmd.iterate("name C2' and (chain " + chain_array[2] + ")",
               "stored.C2_info_3.append((index, name, elem, resn, resi, chain, b))")
    cmd.iterate("name C2' and (chain " + chain_array[3] + ")",
               "stored.C2_info_4.append((index, name, elem, resn, resi, chain, b))")
    O5_info_1 = np.array(stored.O5_info_1)
    O5_info_2 = np.array(stored.O5_info_2)
    O5_info_3 = np.array(stored.O5_info_3)
    O5_info_4 = np.array(stored.O5_info_4)
    C2_info_1 = np.array(stored.C2_info_1)
    C2_info_2 = np.array(stored.C2_info_2)
    C2_info_3 = np.array(stored.C2_info_3)
    C2_info_4 = np.array(stored.C2_info_4)

# Removes the first O5' if it resides on the first residue
if C2_info_1[0][4] == O5_info_1[0][4] and C2_info_1[0][5] == O5_info_1[0][5]:
    O5_info_1 = np.delete(O5_info_1, 0, 0)
if C2_info_2[0][4] == O5_info_2[0][4] and C2_info_2[0][5] == O5_info_2[0][5]:
    O5_info_2 = np.delete(O5_info_2, 0, 0)
if C2_info_3[0][4] == O5_info_3[0][4] and C2_info_3[0][5] == O5_info_3[0][5]:
    O5_info_3 = np.delete(O5_info_3, 0, 0)
if C2_info_4[0][4] == O5_info_4[0][4] and C2_info_4[0][5] == O5_info_4[0][5]:
    O5_info_4 = np.delete(O5_info_4, 0, 0)

```

```
O5_info = np.concatenate((O5_info_1, O5_info_2, O5_info_3, O5_info_4))
```

```
elif len(chain_array) == 5:  
    cmd.iterate("name O5' and (chain " + chain_array[0] + ")",  
               "stored.O5_info_1.append((index, name, elem, resn, resi, chain, b)))"  
    cmd.iterate("name O5' and (chain " + chain_array[1] + ")",  
               "stored.O5_info_2.append((index, name, elem, resn, resi, chain, b)))"  
    cmd.iterate("name O5' and (chain " + chain_array[2] + ")",  
               "stored.O5_info_3.append((index, name, elem, resn, resi, chain, b)))"  
    cmd.iterate("name O5' and (chain " + chain_array[3] + ")",  
               "stored.O5_info_4.append((index, name, elem, resn, resi, chain, b)))"  
    cmd.iterate("name O5' and (chain " + chain_array[4] + ")",  
               "stored.O5_info_5.append((index, name, elem, resn, resi, chain, b)))"  
    cmd.iterate("name C2' and (chain " + chain_array[0] + ")",  
               "stored.C2_info_1.append((index, name, elem, resn, resi, chain, b)))"  
    cmd.iterate("name C2' and (chain " + chain_array[1] + ")",  
               "stored.C2_info_2.append((index, name, elem, resn, resi, chain, b)))"  
    cmd.iterate("name C2' and (chain " + chain_array[2] + ")",  
               "stored.C2_info_3.append((index, name, elem, resn, resi, chain, b)))"  
    cmd.iterate("name C2' and (chain " + chain_array[3] + ")",  
               "stored.C2_info_4.append((index, name, elem, resn, resi, chain, b)))"  
    cmd.iterate("name C2' and (chain " + chain_array[4] + ")",  
               "stored.C2_info_5.append((index, name, elem, resn, resi, chain, b)))"  
    O5_info_1 = np.array(stored.O5_info_1)  
    O5_info_2 = np.array(stored.O5_info_2)  
    O5_info_3 = np.array(stored.O5_info_3)  
    O5_info_4 = np.array(stored.O5_info_4)  
    O5_info_5 = np.array(stored.O5_info_5)  
    C2_info_1 = np.array(stored.C2_info_1)  
    C2_info_2 = np.array(stored.C2_info_2)  
    C2_info_3 = np.array(stored.C2_info_3)  
    C2_info_4 = np.array(stored.C2_info_4)  
    C2_info_5 = np.array(stored.C2_info_5)  
  
    # Removes the first O5' if it resides on the first residue  
    if C2_info_1[0][4] == O5_info_1[0][4] and C2_info_1[0][5] == O5_info_1[0][5]:  
        O5_info_1 = np.delete(O5_info_1, 0, 0)  
    if C2_info_2[0][4] == O5_info_2[0][4] and C2_info_2[0][5] == O5_info_2[0][5]:  
        O5_info_2 = np.delete(O5_info_2, 0, 0)  
    if C2_info_3[0][4] == O5_info_3[0][4] and C2_info_3[0][5] == O5_info_3[0][5]:  
        O5_info_3 = np.delete(O5_info_3, 0, 0)  
    if C2_info_4[0][4] == O5_info_4[0][4] and C2_info_4[0][5] == O5_info_4[0][5]:  
        O5_info_4 = np.delete(O5_info_4, 0, 0)  
    if C2_info_5[0][4] == O5_info_5[0][4] and C2_info_5[0][5] == O5_info_5[0][5]:  
        O5_info_5 = np.delete(O5_info_5, 0, 0)  
    O5_info = np.concatenate((O5_info_1, O5_info_2, O5_info_3, O5_info_4, O5_info_5))
```

```

else:
    print("ERROR: This plugin cannot handle more than 5 chains.")
    return

# Create a file to write non scissile phosphate data to
with open(directory + '\\%s.txt' % (pdb + " Non-Scissile Phosphate O5' Contacts"), "w") as
f_non_scissile:

    # Creates a header
    f_non_scissile.write("***%s Contacts***\n" % (pdb + " Non-Scissile Phosphate O5'
Contacts"))
    f_non_scissile.write("aoiResi" + '\t' + "aoiAtom" + '\t' + "caIndex" + '\t' + "caAtom" + '\t' +
"caResi" + '\t'
                        + "caChain" + '\t' + "Dist" + '\n')

# Iterates through all the stored O5's
for a in range(len(O5_info)):

    # Give a default chain letter of Z if no chain letter was previously assigned
    if len(O5_info[a][5]) < 1:
        O5_info[a][5] = 'Z'

    # Find and stores all contacts within 5 angstroms of each O5'
    stored.CA_info = []
    cmd.iterate(("all within 5 of index " + str(O5_info[a][0])),
"stored.CA_info.append((index, name, elem, "
                        "resn, resi, chain, b))")
    CA_info = np.array(stored.CA_info)

    for b in range(len(CA_info)):
        if len(CA_info[b][5]) < 1:
            CA_info[b][5] = 'Z'

    # Determines the CA distances to the O5' at the scissile phosphate and writes them to a
separate text file
    if O5_info[a][4] == plus_one_nucleotide and (O5_info[a][5] == chain_array[0] or
chain_array[0] == 'NONE'):
        with open(directory + '\\%s.txt' % (pdb + " Scissile Phosphate O5' Contacts"), "w") as
f_scissile:

            f_scissile.write("***%s Contacts***\n" % (pdb + " Scissile Phosphate O5'
Contacts"))
            f_scissile.write("aoiResi" + '\t' + "aoiAtom" + '\t' + "caIndex" + '\t' + "caAtom" + '\t'
+ "caResi"
                            + '\t' + "caChain" + '\t' + "Dist" + '\n')

```

```

    for b in range(len(CA_info)):
        dist = cmd.distance(("index %s" % O5_info[a][0]), ("index %s" %
CA_info[b][0]))

        f_scissile.write(O5_info[a][3] + O5_info[a][4] + '\t' + O5_info[a][1] + '\t' +
str(CA_info[b][0]) + '\t' + CA_info[b][1] + '\t' + CA_info[b][3] +
CA_info[b][4] + '\t' + CA_info[b][5] + '\t' + str(dist) + '\n')

    continue

# Determines the CA distances to the O5' and writes them to the non-scissile text file
for b in range(len(CA_info)):
    dist = cmd.distance(("index %s" % O5_info[a][0]), ("index %s" % CA_info[b][0]))

    f_non_scissile.write(O5_info[a][3] + O5_info[a][4] + '\t' + O5_info[a][1] + '\t' +
str(CA_info[b][0]) +
        '\t' + CA_info[b][1] + '\t' + CA_info[b][3] + CA_info[b][4] + '\t' +
CA_info[b][5]
        + '\t' + str(dist) + '\n')

# Deletes all distance objects in PyMOL to prevent PyMOL from crashing by storing too
many objects
cmd.delete("dist*")

print("O5' Data Collection Complete")

```

#### IV. Scissile Phosphate Downstream Processing Script

```
# -*- coding: utf-8 -*-
# This script calculate stats on the crystal structures
import os
import numpy as np
import csv
import matplotlib.pyplot as plt
from matplotlib.path import Path
from scipy.misc import imread
import sys
import warnings
import matplotlib as mpl

mpl.rc('font', family='arial')

# These commands make it so we can print the angstrom sign
reload(sys)
sys.setdefaultencoding('utf8')

# Don't show numpy deprecation warnings
warnings.filterwarnings("ignore", category=np.VisibleDeprecationWarning)

def extract_resi_number(resn):
    # This function accepts a residue (Ex: G33) as an argument and will return its
    # residue number (33) as the output
    resi = []
    for n in range(1, len(resn)):
        try:
            resi.append(int(resn[n]))
        except ValueError:
            resi = []
    resi = ".join(map(str, resi))

    if len(resi) == 0:
        return -10
    return int(resi)

def PDBtoRBZ():
    # This function takes no arguments and iterates through all filenames in the cwd.
    # It then identifies a given rbz based on the PDBs present in the filenames. The function
    # returns the rbz name,
    # modlist and mutant list. Modlist is a list of two lists of residue names. Modlist is used to
    # handle numbering
```

# discrepancies. So if a given residue is present in the first of two lists, the corresponding value in the second

# list is assigned to the residue. The mutant list of each rbz is a list containing all mutant residue names

# so that they can be identified

```
RBZlist = []
```

```
glmS = ["2GCS", "2H0S", "2H0W", "2H0Z", "2HO6", "2H07", "2NZ4", "3g8s", "3G9C",  
"3g8t", "3l3c", "3g96",
```

```
    "2Z75", "2Z74", "2H0X", "3B4A", "3B4B", "3B4C", "2GCV"]
```

```
HH = ["1MME", "299D", "300D", "301D", "359D", "2OEU", "3ZD4", "3ZD5", "3ZP8",  
"5DI2", "5DI4", "5DQK", "5DH6",
```

```
    "5DH7", "5DH8", "5EAO", "5EAQ", "1NYI", "1Q29", "2QUS", "1HMH", "1RMN",  
"2QUW"]
```

```
Twister = ["4RGE", "4RGF", "4OJI", "4QJD", "4QJH", "5DUN", "ACTI", "NEUT", "TS"]
```

```
Hairpin = ["2D2K", "1X9K", "1X9C", "2D2L", "2OUE", "1ZFT", "2FGP", "1ZFB", "1ZFX",  
"3B5A", "3B58", "3B5F", "3B5S",
```

```
    "3B91", "3BBI", "3BBK", "3BBM", "3CR1", "3I2Q", "3I2R", "3I2S", "3I2U",  
"2NPY", "2NPZ", "2P7D", "2P7E",
```

```
    "2P7F", "1M5K", "1M5O", "1M5V", "3CQS", "4G6P", "4G6R", "4G6S", "3GS1",  
"3GS8", "2BCY", "2BCZ", "3GS5",
```

```
    "1M5P"]
```

```
Pistol = ["5K7C", "5K7D", "5K7E", "5KTJ"]
```

```
HDV = ["2OJ3", "2OIH", "1SJ3", "1VBX", "1VBY", "1VBZ", "1VC6", "1SJF", "1VC0",  
"1VC5", "1SJ4", "4PRF", "4PR6"]
```

```
VS = ["4R4P", "4R4V", "5V3I"]
```

```
twister_sister = ["5T5A"]
```

```
for filename in os.listdir(os.getcwd()):
```

```
    if filename == "Search.txt" or ".txt" not in filename:
```

```
        continue
```

```
    PDB = filename.split("_")[0]
```

```
    PDB = PDB.upper()
```

```
    # Change the name of file_name if working with Darrin's files
```

```
    if "Active" in filename:
```

```
        PDB = "ACTI"
```

```
    elif "Neutral" in filename:
```

```
        PDB = "NEUT"
```

```
    elif "TS" in filename:
```

```
        PDB = "TS"
```

```
    if PDB in glmS:
```

```
        RBZlist.append("glmS")
```

```
    elif PDB in HH:
```

```
        RBZlist.append("HH")
```

```

elif PDB in Twister:
    RBZlist.append("Twister")
elif PDB in Hairpin:
    RBZlist.append("Hairpin")
elif PDB in Pistol:
    RBZlist.append("Pistol")
elif PDB in HDV:
    RBZlist.append("HDV")
elif PDB in twister_sister:
    RBZlist.append("Twi_sis")
elif PDB in VS:
    RBZlist.append("VS")

r_b_z = RBZlist[0]

# Check to see if all structures are from the same ribozyme
uniform = 1
for n in range(0, len(RBZlist)):
    if RBZlist[n] != r_b_z:
        uniform = 0
        break
if uniform == 1:
    r_b_z = RBZlist[0]
else:
    r_b_z = "UND"
    print("ERROR: Not all PDB's are recognized")

# The left part of the array is the part to be changed, the right is the new part
glms_mutant_list = ["G33A", "Glc6P", "6MN"]
glms_mod_list = np.array(
    [
        ["2AD0", "A2M", "G39", "G40", "U51", "U67", "G65", "G6P", "GLP", "HOH", "A32",
        "A33", "A38", "A40", "6MN12",
        "G66", "A-1", "3AD-1"],
        ["A0", "A0", "G32", "G33", "U43", "U59", "G57", "Glc6P", "GlcN6P", "HOH", "G33A",
        "G33A", "A31", "G33A",
        "6MN", "G59", "A0", "A0"]])

hh_mutant_list = ["G12A"]
hh_mod_list = np.array(
    [
        ["HOH", "Mn", "Mg", "Na", "A36", "G39", "C38", "A39", "A19", "G21", "G20", "A22",
        "G36", "OMC16", "CVC7",
        "U8", "DC7", "OMC6", "C7"],
        ["HOH", "MT", "MT", "Na", "G12A", "G12", "C35", "G12A", "A18", "G8", "G8", "A21",
        "G12", "U16", "U16",
        "C17", "U16", "U16", "C17"]])

```



```

twister_mutant_list = []
twister_mod_list = np.array(
    ["HOH", "Mn", "Mg", "Na", "GX145", "A29", "G40", "A10", "AP37", "A7", "U40",
"U45", "U6", "A6", "G62", "A61",
    "A63", "A39", "DU5", "G45", "OMU5", "U9", "G65"],
    ["HOH", "MT", "MT", "Na", "G48", "A30", "G48", "A1", "A1", "A1", "U44", "U44", "U-
1", "A1", "G48", "A47",
    "A41", "A47", "U-1", "G48", "U-1", "U-1", "G48"]])

hairpin_mutant_list = ["G8A", "N6G8", "I8", "A38G"]
hairpin_mod_list = np.array(
    ["HOH", "Mn", "Mg", "Na", "A8", "G38", "A57", "C15", "G12", "N6G38", "A39", "I12",
"3AD5", "P5P38", "MTU8"],
    ["HOH", "MT", "MT", "Na", "G8A", "A38G", "A38", "C8", "G8", "N6G8", "A9", "I8",
"A5", "A38P", "G8AP"]])

pistol_mutant_list = ["A32G"]
pistol_mod_list = np.array(["HOH", "MN", "Mg", "Na", "DG53", "U11", "G10", "NCO",
"G32"],
    ["HOH", "MT", "MT", "Na", "G53", "U54", "G53", "NCO", "A32G"]])

hdv_mutant_list = ["C75U"]
hdv_mod_list = np.array(["HOH", "Mn", "Mg", "Na", "U163"], ["HOH", "MT", "MT", "Na",
"C75U"]])

vs_mutant_list = ["A756G", "G638A"]
vs_mod_list = np.array(["HOH", "Mn", "Mg", "Na", "G756", "A638", "G751", "A751"],
    ["HOH", "MT", "MT", "Na", "A756G", "G638A", "A756", "A756"]])

twi_sis_mutant_list = []
twi_sis_mod_list = np.array(["HOH", "MN", "Mg", "Na"], ["HOH", "MT", "MT", "Na"])

if r_b_z == "glmS":
    mod_list = glms_mod_list
    mutant_list = glms_mutant_list
if r_b_z == "HH":
    mod_list = hh_mod_list
    mutant_list = hh_mutant_list
if r_b_z == "Twister":
    mod_list = twister_mod_list
    mutant_list = twister_mutant_list
if r_b_z == "Hairpin":
    mod_list = hairpin_mod_list
    mutant_list = hairpin_mutant_list
if r_b_z == "Pistol":
    mod_list = pistol_mod_list

```

```

    mutant_list = pistol_mutant_list
if r_b_z == "HDV":
    mod_list = hdv_mod_list
    mutant_list = hdv_mutant_list
if r_b_z == "VS":
    mod_list = vs_mod_list
    mutant_list = vs_mutant_list
if r_b_z == "Twi_sis":
    mod_list = twi_sis_mod_list
    mutant_list = twi_sis_mutant_list
if r_b_z == "UND":
    mod_list = []
    mutant_list = []

return r_b_z, mod_list, mutant_list

```

```

def mut_to_WT(resn):
    # This function accepts a residue name as an argument and converts mutant residue names to
    # wild type residue names
    change_log = [ ["G8A", "N6G8", "I12", "A38G", "G12A", "G33A", "Glc6P", "G638A",
"C75U"],
    ["G8", "G8", "G8", "G8", "G12", "G33", "GlcN6P", "G638", "C75"] ]
    for x in range(len(change_log[0])):
        if change_log[0][x] == resn:
            return change_log[1][x]
    return ""

```

```

def ArrayStats(atom, resn, dist, bfact, angle_one, RBZStats, contacts_to_parent_mol, modlist,
active_site):
    # This function serves to add entries to the list of contacts (RBZStats) with sums of distances,
    # angles,
    # b-factors, and number of times the contact was observed (occurrence).
    # It then outputs RBZStats, as well as contacts_to_parent_mol, which is the same as RBZStats
    # but it consists
    # solely of contacts made to the -1/1 bases.

    # Find the residue number of the incoming contact atom
    resi = extract_resi_number(resn)

    # Define the height of temp_array
    row_height = 9

    # Make array of proper size to hold data for RBZStats
    # Later on this will be used to add the contact row to the total for that contact

```

```

temp_array = np.chararray(row_height, itemsize=10)
temp_array[:] = ""
temp_array[0] = atom
temp_array[1] = resn
temp_array[2] = angle_one
temp_array[3] = dist
temp_array[4] = bfact
temp_array[5] = '1' # Occurrence angle_one
temp_array[6] = '1' # StdDev dist
temp_array[7] = '1' # StdDev bfact
temp_array[8] = '1' # Times found
temp_array = np.vstack(temp_array)

# Write is a variable to let the loops below communicate on whether or not to write
write = True

# If the aoi is the incoming atom, do not add its data to the arrays
if "AOI" in atom:
    return RBZStats, contacts_to_parent_mol

# If a given contact is found in RBZStats and the contact is not to the -1/1 bases, add its data to
RBZStats
for n in range(len(RBZStats[0])):
    if atom == RBZStats[0][n] and resn == RBZStats[1][n] and resi not in active_site and write:
        RBZStats[2][n] = str(float(RBZStats[2][n]) + float(angle_one))
        RBZStats[3][n] = str(float(RBZStats[3][n]) + float(dist))
        RBZStats[4][n] = str(float(RBZStats[4][n]) + float(bfact))
        RBZStats[8][n] = str(int(RBZStats[8][n]) + 1)
        if float(angle_one) > 0:
            RBZStats[5][n] = str(int(RBZStats[5][n]) + 1)
        write = False

# If a given contact is found in contacts_to_parent_mol and the contact is made to either the -1
or 1 base, add
# its data to contacts_to_parent_mol
for n in range(len(contacts_to_parent_mol[0])):
    if atom == contacts_to_parent_mol[0][n] and resn == contacts_to_parent_mol[1][n] \
        and resi in active_site and write:
        contacts_to_parent_mol[2][n] = str(float(contacts_to_parent_mol[2][n]) +
float(angle_one))
        contacts_to_parent_mol[3][n] = str(float(contacts_to_parent_mol[3][n]) + float(dist))
        contacts_to_parent_mol[4][n] = str(float(contacts_to_parent_mol[4][n]) + float(bfact))
        contacts_to_parent_mol[8][n] = str(int(contacts_to_parent_mol[8][n]) + 1)
        if float(angle_one) > 0:
            contacts_to_parent_mol[5][n] = str(int(contacts_to_parent_mol[5][n]) + 1)
        write = False

```

```

# If the contact hasn't been found, add it to the appropriate list
if write and resi not in active_site:
    RBZStats = np.append(RBZStats, temp_array, 1)
    write = False
if write and resi in active_site:
    contacts_to_parent_mol = np.append(contacts_to_parent_mol, temp_array, 1)
    write = False
return RBZStats, contacts_to_parent_mol

def txt_to_graph(new_dir):
    # This function serves to identify relevant contacts to a given aoi in a given rbz. Both the aoi
    and ribozyme
    # are specified by the new directory argument (new_dir).

    # Change directory to the new directory
    os.chdir(new_dir)

    # split start should be
    # 8 for files made after July 2016
    # 7 for files treated with DuplicateHandler
    # 9 for files from July 2016 and June 2017
    splitStart = 9
    outcount = 0
    rowHeight = 9
    minfound = 0.25
    step_num = 7
    Top = 15 # Variable to tell the program how many contacts to sort
    size = 500
    size_ave = 4 * size
    yticks = np.linspace(2, 5.5, 8)

    # Verts are points to be followed when creating bars for graphs
    verts = [
        (0., 0.),
        (0., 0.5),
        (6, 0.5),
        (6, 0.),
        (0., 0.),
    ]

    verts_ave = [
        (15.0, 0.0),
        (30.0, 0.0),
        (30, 0.5),
    ]

```

```

(15, 0.5),
(0., 0.5),
(0.0, 0.0),
(15.0, 0.0)
]

verts_mutant = [
(0., 0.),
(0., 1.0),
(4, 1.0),
(4, 0.),
(0., 0.),
]

# Codes are instructions for how to traverse the verts
codes = [Path.MOVETO,
Path.LINETO,
Path.LINETO,
Path.LINETO,
Path.CLOSEPOLY,
]

codes_ave = [Path.MOVETO,
Path.LINETO,
Path.LINETO,
Path.LINETO,
Path.LINETO,
Path.LINETO,
Path.CLOSEPOLY,
]

# Create a path from the codes and vertices defined above
# The path will be used to make a marker for the graph
path = Path(verts, codes)
path_ave = Path(verts_ave, codes_ave)
path_mutant = Path(verts_mutant, codes)

# The list of all the row labels. These are used in the text file
array_descriptor = np.chararray(rowHeight, itemsize=20)
array_descriptor[0] = "Atom      :"
array_descriptor[1] = "Resn      :"
array_descriptor[2] = "Ave Angle 1  :"
array_descriptor[3] = "Ave dist   :"
array_descriptor[4] = "Ave bfact  :"
array_descriptor[5] = "Occur Ang 1  :"
array_descriptor[6] = "StdDev Dist  :"

```

```

array_descriptor[7] = "StdDev Bfact :"
array_descriptor[8] = "Times found :"

sugar_list = np.array(["C1", "C2", "O2", "C3", "O3", "O4", "C4", "C5", "OP1", "OP2"])

rbz_data, contacts_to_parent_mol = np.chararray((rowHeight, 1), itemsize=5),
np.chararray((rowHeight, 1),
                                                    itemsize=5)
rbz_data[:, contacts_to_parent_mol[:]] = "", ""

rbz_name, modify_list, mutant_list = PDBtoRBZ()
non_cat_list = ["1MME", "299D", "300D", "301D", "359D", "4QJD", "1NYI", "1Q29",
"1HMH"]
vanadate_rbz_list = ["5EAO", "5EAQ", "2P7E", "1M5O", "3B58", "3B5F", "3B91", "3BBK",
"3I2R", "3I2U", "2P7F",
                    "3B4B", "3B4C", "3CQS", "3GS8", "TS"]
unmod_aoi_list = ["O2", "OP1", "OP2", "O5"]

pdb_list = ['2GCS', '2H0S', '2H0Z', '2HO7', '2H0X', '2NZ4', '3G8S', '3G8T', '3L3C', '3G96',
'2Z75', '2Z74', '3B4A',
            '3B4B', '3B4C', '4MEH', '4MEG', '2GCV', '2H0W', '2HO6', '3G9C', '2OEU', '2QUS',
'2QUW', '3ZD4', '3ZD5',
            '3ZP8', '5DI2', '5DI4', '5DQK', '5DH6', '5DH7', '5DH8', '379D', '1NYI', '1HMH',
'1Q29', '1RMN', '5EAO',
            '5EAQ', '1MME', '299D', '300D', '301D', '359D', '4RGE', '4RGF', '4OJI', '4QJD',
'4QJH', '5DUN',
            'Triple_RS_Active', 'Triple_RS_Neutral', 'Triple_TS', '3GS1', '3GS5', '3GS8', '4G6P',
'4G6R', '4G6S',
            '2BCY', '2BCZ', '3CQS', '2D2K', '1X9K', '1X9C', '2D2L', '2OUE', '1ZFT', '2FGP',
'1ZFY', '1ZFX', '3B5A',
            '3B58', '3B5F', '3B5S', '3B91', '3BBK', '3BBM', '3CR1', '3I2Q', '3I2R', '3I2S', '2NPY',
'2NPZ', '1M5K',
            '1M5O', '3BBI', '3I2U', '2P7D', '2P7E', '2P7F', '1M5V', '1M5P', '5K7C', '5K7D', '5K7E',
'5KTJ']

res_list = ['2.1', '2.35', '2.7', '2.9', '2.3', '2.5', '3.1', '3', '2.85', '3.01', '1.7', '2.2', '2.7', '2.7', '3',
'3.12', '3.1', '2.1', '2.4', '2.8', '2.9', '2', '2.4', '2.2', '2.2', '2.2', '1.55', '2.99', '2.95',
'2.71', '2.78', '3.06', '3.3', '3.1', '2.85', '2.6', '3', 'N/A', '2.99', '3.2', '3.1', '3', '3', '3',
'2.9', '2.89', '3.2', '2.3', '3.1', '3.88', '2.64', 'n/a', 'n/a', 'n/a', '2.85', '2.75', '2.85', '2.64',
'2.83', '2.84', '2.7', '2.4', '2.8', '2.65', '3.17', '2.19', '2.5', '2.05', '2.33', '2.4', '2.4',
'2.38', '2.35', '2.65', '2.7', '2.25', '2.75', '2.75', '2.65', '2.25', '2.9', '2.8', '2.75', '2.65',
'3.35', '2.4', '2.2', '2.35', '2.8', '2.25', '2.05', '2.35', '2.4', '2.6', '2.73', '2.68', '3.27',
'2.97']

# Initialize aoi_list. This will hold the list of aoi's in the CWD and will later be used to assign
a filename

```

```

# for the graph
aoi_list = []

# Open every file in the current directory to extract data
for file_name in os.listdir(os.getcwd()):
    active_site_resi_num = []
    outcount += 1
    pdb = file_name[:4].upper()

    if file_name == "Search.txt" or ".txt" not in file_name or pdb in non_cat_list:
        outcount -= 1
        continue

    # Split up the filename to extract the atom of interest
    file_name_split = file_name.split('_')
    if file_name_split[1] in unmod_aoi_list:
        aoi_list.append(file_name_split[1])
    elif rbz_name == "Twister":
        aoi = [x for x in unmod_aoi_list if x in file_name]
        aoi_list.append(aoi[0])
    elif rbz_name == "VS":
        aoi_list.append(file_name_split[2])
    else:
        aoi_list.append(file_name_split[1])

    with open(file_name) as File:
        raw = File.read()
        split = raw.split()

        for n in range(splitStart, len(split), step_num):

            # Ignore contacts greater than 5A away
            if float(split[n + 3]) > 5.0:
                continue

            # Change name of resn to account for numbering discrepancies
            for x in range(len(modify_list[0])):
                if modify_list[0][x] in split[n + 1]:
                    split[n + 1] = modify_list[1][x]
                    break
            for c in ["MN", "MG", "TB", "CA", "Co"]:
                if c in split[n + 2]:
                    split[n + 2] = "MT"
                    split[n + 1] = "MT"
                    break
            # Rename VS according to its special way (Add 5 to the residue number if it's >= 676

```

```

if "VS" in rbz:
    resi_num = extract_resi_number(split[n + 1])
    if resi_num >= 676:
        new_resi_num = resi_num + 5
        split[n + 1].replace(str(resi_num), str(new_resi_num))
    if "AOI" in split[n + 2] and len(active_site_resi_num) < 1:
        atom_name_stripped = split[n + 2].replace("AOI", "")
        atom_name_stripped = atom_name_stripped.replace("_", "")

    if atom_name_stripped in ["O2", "N", "O01"]:
        active_site_resi_num.append(extract_resi_number(split[n + 1])) # -1 base
        active_site_resi_num.append(active_site_resi_num[0] + 1) # +1 base
        continue

    else:
        active_site_resi_num.append(extract_resi_number(split[n + 1])) # -1 base
        active_site_resi_num.append(active_site_resi_num[0] - 1) # +1
        continue

for n in range(splitStart, len(split), step_num):
    rbz_data, contacts_to_parent_mol = ArrayStats(split[n + 2], split[n + 1], split[n + 3],
                                                split[n + 5], split[n + 4], rbz_data,
                                                contacts_to_parent_mol, modify_list,
active_site_resi_num)
# Average the angles, distances and b-factors
for n in range(2, 5):
    for t in range(1, len(rbz_data[0])):
        rbz_data[n][t] = str(float(rbz_data[n][t]) / float(rbz_data[8][t]))

for n in range(3, 5):
    for t in range(1, len(contacts_to_parent_mol[0])):
        contacts_to_parent_mol[n][t] = str(
            float(contacts_to_parent_mol[n][t]) / float(contacts_to_parent_mol[8][t]))
    if n > 3:
        if float(contacts_to_parent_mol[5][t]) > 1.0:
            contacts_to_parent_mol[2][t] = str(
                float(contacts_to_parent_mol[2][t]) / float(contacts_to_parent_mol[5][t]))

# findTop searches through an existing list of contacts, taking the list of contacts (like
rbz_data),
# top positions (like top 5), minimum number of times a contact should be found (Like 25%),
and whether
# or not the incoming list is the list of parent contacts
def findTop(list_of_contacts, top, occ_threshold, is_parent, outer_count):
    count = 0
    list_of_positions = np.ones(top) # list_of_positions is the position in rbz_data
    list_of_positions[:] = 0

```



```

top_average_distances = np.ones(top)
temp_ave = np.ones(top)
temp_pos = np.ones(top)
top_average_distances[:] = 5
if is_parent:
    exclude_list = ["C1", "C2", "O2", "C3", "O3", "O4", "C4", "C5", "O5", "P", "OP1",
"OP2", "H", "C"]
    include_list = []
else:
    exclude_list = ["C", "H", "P"]
    include_list = ["OP1", "OP2"]

for n in range(1, len(list_of_contacts[0])):

    # This loop serves to compare the rbz_data array and the top_average_distances array
    for c in range(top):
        # Exclude certain contacts
        panic = False
        for exclude_atom in exclude_list:
            if str(exclude_atom) in list_of_contacts[0][n] or "NCO" in list_of_contacts[1][n] \
                and "Co" not in list_of_contacts[0][n]:
                panic = True
        for include_atom in include_list:
            if str(include_atom) in list_of_contacts[0][n]:
                panic = False
        if panic:
            break

        # If the average distance is lower than the current value
        # AND the contact is found in 25% of the structures
        # Shift list_of_positions and top_average_distances down one

        if float(list_of_contacts[3][n]) < top_average_distances[c] and
int(list_of_contacts[8][n]) >= int(
            occ_threshold * outer_count):
            # Assign the placeholder
            for t in range(0, top):
                temp_ave[t] = top_average_distances[t]
                temp_pos[t] = list_of_positions[t]
            top_average_distances[c] = float(list_of_contacts[3][n])
            list_of_positions[c] = n
            # This loop serves to bump down all values
            for t in range(c + 1, top):
                top_average_distances[t] = temp_ave[t - 1]
                list_of_positions[t] = temp_pos[t - 1]
            break

```

```

list_of_positions = [int(x) for x in list_of_positions if x > 1]
return list_of_positions

# Sort rbz_data
parent_contact_positions = findTop(contacts_to_parent_mol, Top, minfound, True, outcount)
# Include contacts_to_parent_mol if relevant
for x in range(0, len(parent_contact_positions)):
    temp_array = np.chararray(rowHeight, itemsize=10)
    # temp_array[:] = ""
    if float(contacts_to_parent_mol[2][parent_contact_positions[x]]) > 140.0:
        for t in range(rowHeight):
            # Make array of proper size to hold data for rbz_data
            # Later on this will be used to add the contact row to the total for that contact
            temp_array[t] = contacts_to_parent_mol[t][parent_contact_positions[x]]
            temp_array = np.vstack(temp_array)
        rbz_data = np.append(rbz_data, temp_array, 1)

# Sort rbz_data
top_contact_positions = findTop(rbz_data, Top, minfound, False, outcount)

# Create .csv file for excel/kaleidagraph
fl = open("TextSearcher_1.7_" + str(rbz_name) + ".csv", 'wb')
writer = csv.writer(fl)

# Create lists for x's and y's to be plotted with matplotlib
y_list = []
angle_plot_list = []
y_labels = []
y_list_std_dev = []
y_list_mutant = []
y_mutant_labels = []
non_cat_y_list = []
non_cat_label_list = []
marker_color_list = []

# This section of code serves to loop through all the important contacts and find all of the
observed distances
for t in range(0, len(top_contact_positions)):
    dist_list = np.array([])
    bfact_list = np.array([])
    count_list = np.array([])
    angle_one_list = np.array([])
    color_list = []

# This loop opens every file in the current directory except for unrelated files
for file_name in os.listdir(os.getcwd()):

```

```

count = 0
pdb = file_name[:4].upper()
if pdb == "TRIP":
    pdb = file_name.split('_')
    pdb = pdb[1]

# If file_name isn't one of the text files with data, skip it (continue)
if file_name == "Search.txt" or ".txt" not in file_name or pdb in non_cat_list:
    continue

with open(file_name) as File:
    raw = File.read()
    split = raw.split()

# This loop serves to iterate through contacts in file_name
for n in range(splitStart, len(split), step_num):

    # Ignore contacts greater than 5A away
    if float(split[n + 3]) > 5.0:
        continue

# Rename VS according to its special way (Add 5 to the residue number if it's >=
676
if "VS" in rbz:
    resi_num = extract_resi_number(split[n + 1])
    if resi_num >= 676:
        new_resi_num = resi_num + 5
        split[n + 1].replace(str(resi_num), str(new_resi_num))

# Split[n + 1] and split[n] are renamed to make things easier to follow
atom = split[n + 2]
resn = split[n + 1]

# Instead of split[n], we need to use the condensed version so that we can find the
renamed mutants
# and re-numbered bases
for c in range(len(modify_list[0])):
    if modify_list[0][c] in resn:
        resn = modify_list[1][c]
        break
for c in ["MN", "MG", "CA", "TB"]:
    if c in atom:
        atom = "MT"
        resn = "MT"

# Append each observed value to the array if it is found in the rbz_data array

```

```

        if atom == rbz_data[0][top_contact_positions[t]] and resn in
rbz_data[1][top_contact_positions[t]]:
            angle_one = split[n + 4]
            angle_one_list = np.append(angle_one_list, float(angle_one))
            dist_list = np.append(dist_list, float(split[n + 3]))
            bfact_list = np.append(bfact_list, float(split[n + 5]))
            count += 1

        # If the observed value is from a vanadate structure, color it magenta
        if pdb not in vanadate_rbz_list and len(pdb) > 3:
            color_list.append('k')
        elif pdb in vanadate_rbz_list:
            color_list.append('m')
        else:
            color_list.append('y')

        count_list = np.append(count_list, count)
        marker_color_list.append(color_list)
        y_labels.append(rbz_data[0][top_contact_positions[t]] + '\n' +
rbz_data[1][top_contact_positions[t]])
        angle_plot_list.append(list(angle_one_list))
        y_list.append(list(dist_list))
        y_list_std_dev.append([np.std(dist_list) + np.mean(dist_list), np.mean(dist_list) -
np.std(dist_list)])
        std_dev_dist = np.std(dist_list)
        std_dev_bfact = np.std(bfact_list)
        writer.writerow([])
        writer.writerow(rbz_data[0][top_contact_positions[t]] +
rbz_data[1][top_contact_positions[t]])
        writer.writerow(dist_list)
        writer.writerow(angle_one_list)
        writer.writerow(count_list)
        rbz_data[6][top_contact_positions[t]] = std_dev_dist
        rbz_data[7][top_contact_positions[t]] = std_dev_bfact

mutant_contacts = []
# Write mutant contacts to csv
for n in range(len(mutant_list)):
    for t in range(0, len(rbz_data[1])):
        if mutant_list[n] in rbz_data[1][t]:
            mutant_contacts.append(t)

writer.writerow(["MUTANT CONTACTS"])
for t in range(0, len(mutant_contacts)):
    # Initialize numpy arrays

```

```

angle_list, dist_list, bfact_list, count_list = np.array([]), np.array([]), np.array([]),
np.array([])

# This loop opens every file in the current directory except for unrelated files
for file_name in os.listdir(os.getcwd()):
    count = 0

    # If file_name isn't one of the text files with data, skip it (continue)
    if file_name == "Search.txt" or ".txt" not in file_name:
        continue

    with open(file_name) as File:
        raw = File.read()
        split = raw.split()

        # This loop serves to iterate through contacts in file_name
        for n in range(splitStart, len(split), step_num):
            # Rename VS according to its special way (Add 5 to the residue number if it's >=
676
            if "VS" in rbz:
                resi_num = extract_resi_number(split[n + 1])
                if resi_num >= 676:
                    new_resi_num = resi_num + 5
                    split[n + 1].replace(str(resi_num), str(new_resi_num))
            # Instead of split[n], we need to use the condensed version so that we can find the
renamed mutants
            # and re-numbered bases
            atom = split[n + 2]
            resn = split[n + 1]

            for c in range(0, len(modify_list[0])):
                if modify_list[0][c] in resn:
                    resn = modify_list[1][c]
                    break
            if atom == rbz_data[0][mutant_contacts[t]] and resn ==
rbz_data[1][mutant_contacts[t]] \
                and "C" not in atom and "H" not in atom:
                angle_list = np.append(angle_list, float(split[n + 4]))
                dist_list = np.append(dist_list, float(split[n + 3]))
                bfact_list = np.append(bfact_list, float(split[n + 5]))
                count += 1
            count_list = np.append(count_list, count)
        y_list_mutant.append(list(dist_list))
        y_mutant_labels.append(rbz_data[0][mutant_contacts[t]] + '\n' +
rbz_data[1][mutant_contacts[t]])
        std_dev_dist = np.std(dist_list)

```

```

std_dev_bfact = np.std(bfact_list)

writer.writerow([])
writer.writerow(rbz_data[0][mutant_contacts[t]] + rbz_data[1][mutant_contacts[t]])
writer.writerow(dist_list)
writer.writerow(angle_list)
writer.writerow(count_list)

rbz_data[6][mutant_contacts[t]] = std_dev_dist
rbz_data[7][mutant_contacts[t]] = std_dev_bfact

writer.writerow(["PARENT MOL CONTACTS"])

for t in range(len(parent_contact_positions)):
    # Initialize numpy arrays
    angle_list, dist_list, bfact_list, count_list = np.array([]), np.array([]), np.array([]),
np.array([])

    # This loop opens every file in the current directory except for unrelated files
    for file_name in os.listdir(os.getcwd()):
        count = 0

        # If file_name isn't one of the text files with data, skip it (continue)
        if file_name == "Search.txt" or ".txt" not in file_name:
            continue

        with open(file_name) as File:
            raw = File.read()
            split = raw.split()

            # This loop serves to iterate through contacts in file_name
            for n in range(splitStart, len(split), step_num):

                # Instead of split[n], we need to use the condensed version so that we can find the
renamed mutants
                # and re-numbered bases
                atom = split[n + 2]
                resn = split[n + 1]

                for c in range(0, len(modify_list[0])):
                    if modify_list[0][c] in resn:
                        resn = modify_list[1][c]
                        break

            # Only search through non-cat list once

```

```

if t == len(parent_contact_positions) - 1:
    # Add non-catalytic contacts to a list
    for non_cat_pdb in non_cat_list:
        if non_cat_pdb in file_name.upper():
            for x in range(len(top_contact_positions)):
                if atom == rbz_data[0][top_contact_positions[x]] and resn in rbz_data[1][
                    top_contact_positions[x]]:
                    non_cat_y_list.append([split[n + 3]])
                    non_cat_label_list.append(atom + '\n' + resn)

            if atom == contacts_to_parent_mol[0][parent_contact_positions[t]] and resn == \
                contacts_to_parent_mol[1][
                    parent_contact_positions[t]]:
                angle_list = np.append(angle_list, float(split[n + 4]))
                dist_list = np.append(dist_list, float(split[n + 3]))
                bfact_list = np.append(bfact_list, float(split[n + 5]))
                count += 1

count_list = np.append(count_list, count)

writer.writerow([])
writer.writerow(
    contacts_to_parent_mol[0][parent_contact_positions[t]] + contacts_to_parent_mol[1][
        parent_contact_positions[t]])
writer.writerow(dist_list)
writer.writerow(angle_list)
writer.writerow(count_list)

fl.close()

f = open('Search.txt', 'w')
f.write("Native Contact List" + '\n')
for n in range(0, rowHeight):
    f.write(array_descriptor[n] + '\t')
    for t in range(0, len(top_contact_positions), 1):
        f.write(rbz_data[n][top_contact_positions[t]] + '\t')
    f.write('\n')
f.write('\n')

f.write("Substituted Contact List" + '\n')
for n in range(0, rowHeight - 2):
    f.write(array_descriptor[n] + '\t')
    for t in range(0, len(mutant_contacts)):
        f.write(rbz_data[n][mutant_contacts[t]] + '\t')
    f.write('\n')
f.write('\n')

```

```

# Don't write any contacts that are on the sugarlist to the text file
no_write_list = []
for t in range(1, len(contacts_to_parent_mol[0])):
    if contacts_to_parent_mol[0][t] in sugar_list:
        no_write_list.append(t)

f.write("Contacts to Parent Molecule" + '\n')
for n in range(0, rowHeight):
    f.write(array_descriptor[n] + '\t')
    for t in parent_contact_positions:
        f.write(contacts_to_parent_mol[n][t] + '\t')
    f.write('\n')

f.close()

# ***** Plot Data ***** #
# Create x-axis ticks, 5 numbers evenly spaced between 2.5 and 5
x_list = []
x_list_std_devBars = np.ones(2)
y_list_count = 0
plotted_mutant_labels = []
y_list = list(filter(None, y_list))
angle_plot_list = list(filter(None, angle_plot_list))
# Count the number of non-zero elements in y_list, this makes it so we can plot contacts for
AOIs with <5
# significant contacts
for x in y_list:
    if np.count_nonzero(x) < 1:
        break
    y_list_count += 1
if y_list_count > 5:
    y_list_count = 5
x_axis_tick_num = np.linspace(2.5, 5, y_list_count)

# Do not print any mutant points by themselves if the wild type is in the top 5
y_label_len = y_list_count
label_count = 0

# Iterate through y_labels to see if a mutant resn is present
while label_count < y_label_len:
    label = y_labels[label_count].split()
    if len(label) < 1:
        label_count += 1
    continue

```



```

# Check to see if a mutant is present in the top 5
mutant_resn = ""
mutant_atom = ""
for x in mutant_list:
    if label[1] == x:
        mutant_resn = x
        mutant_atom = label[0]
# If a mutant is present, check to see if the WT exists in the top 5
if mutant_resn:
    wt_resn = mut_to_WT(mutant_resn)
    for t in range(y_list_count):
        entry = y_labels[t].split()
        if len(entry) < 1:
            continue
        elif len(entry[0]) < 2:
            continue
        # If the WT is present, delete the mutant from the list of normal contacts
        if wt_resn == entry[1] and entry[0][-1] in mutant_atom:
            del y_list[label_count]
            del y_labels[label_count]
            del angle_plot_list[label_count]
            del y_list_std_dev[label_count]
            if y_label_len < 5:
                y_label_len -= 1
            label_count -= 1
            break

    label_count += 1

# Create a list of average angles for contacts
# Don't average any angles that are equal to zero
new_pl = []
for x in range(len(angle_plot_list)):
    if np.mean(angle_plot_list[x]) > 0:
        test = filter(lambda a: a != 0, angle_plot_list[x])
    else:
        test = angle_plot_list[x]
    new_pl.append(test)

# Round angles and shift all the angles' x-values
ave_angle_list = [int(round(np.mean(new_pl[x]), 0)) for x in range(y_list_count)]
angle_x_values = x_axis_tick_num[:] - 0.144

# Put angles above each column
for x in range(y_list_count):
    if 140 > ave_angle_list[x] > 1:

```

```

    plt.text(angle_x_values[x], 5.2, str(ave_angle_list[x]) + '°', fontsize=12,
fontname="arial", color='r')
    elif ave_angle_list[x] >= 140:
        plt.text(angle_x_values[x], 5.2, str(ave_angle_list[x]) + '°', fontsize=12,
fontname="arial")
    else:
        plt.text(angle_x_values[x], 5.2, "N/A", fontsize=12, fontname="arial", color="#4F4747")

# Create a list of x's for all the y's using x_axis_tick_num
for x in range(y_list_count):
    x_list_outer = []
    for t in range(0, len(y_list[x])):
        x_list_outer.append(x_axis_tick_num[x] - 0.07754) # The subtraction aligns the points
    x_list.append(x_list_outer)
# Plot mutant and non-catalytic points
for x in range(y_list_count):
    label = y_labels[x].split()
    # If a label position is empty, skip it
    if len(label) < 1:
        continue

    # Search through the list of contacts identified in non-cat structures, if they show up in the
top 5,
    # plot them with their corresponding catalytic contact
    for t in range(len(non_cat_label_list)):
        non_cat_label = non_cat_label_list[t].split()
        if len(non_cat_label) < 1:
            continue

        if label[1] == non_cat_label[1] and label[0] == non_cat_label[0]:
            x_list_non_cat = [x_axis_tick_num[x] - 0.077546 for x_tick in non_cat_y_list[t]]
            plt.scatter(x_list_non_cat, non_cat_y_list[t], marker=path_mutant, s=size,
color='#FF4500')
        for t in range(len(y_mutant_labels)):
            mutant_label = y_mutant_labels[t].split()
            if len(mutant_label) < 1:
                continue

            mutant_label_except = [["GlcN6P", "G8"], ["Glc6P", "N6G8"]]
            # Don't plot a mutant's average and standard deviation bars if the WT is in the top 5
            plot_alone = False
            # If the mutant is in the top 5 proceed further
            if label[0][-1] in mutant_label[0][-1] and label[1] in mutant_label[1] or label[1] in
mutant_label_except[
                0] and mutant_label[1] in mutant_label_except[1] and label[0][1] in
mutant_label[0][1]:

```

```

# If the WT is also in the top 5, don't plot contact by itself
for c in range(y_list_count):
    label_strip = y_labels[c].split()
    WT = mut_to_WT(mutant_label[1])
    # if WT in label_strip[1] and label_strip[0][-1] in mutant_label[0][-1]
    if mutant_label == label_strip:
        plot_alone = True

x_list_mutant = [x_axis_tick_num[x] - 0.077546 for x_tick in y_list_mutant[t]]
plt.scatter(x_list_mutant, y_list_mutant[t], marker=path_mutant, s=size, color='g')

for counter in range(0, len(x_list_mutant)):
    plt.text(float(x_list_mutant[counter] + 0.2), float(y_list_mutant[t][counter]),
            str('<' + mutant_label[1]), fontsize=8, fontname="arial")
    plotted_mutant_labels.append(mutant_label[0][-1] + mutant_label[1])

if plot_alone:
    mean = np.mean(y_list_mutant[t])
    mutant_y_std_dev = [mean + np.std(y_list_mutant[t]), mean -
np.std(y_list_mutant[t])]
    x_list_std_devBars[:] = x_list[x][0] + 0.032872
    plt.plot([x_list_std_devBars[0] + 0.044672, x_list_std_devBars[1] + 0.044672],
            mutant_y_std_dev, color='0.4')
    plt.scatter(x_list[x][0] - 0.07754, mean, marker=path_ave, s=size_ave, color='r')
    plt.scatter(x_list_std_devBars, mutant_y_std_dev, marker=path, s=size / 3,
color='0.4')

# Print Hammerhead's +1 base with its correct number
for x in range(y_list_count):
    if "U16" in y_labels[x]:
        y_labels[x].replace("U16", "U1.1")

# Plot points
for t in range(y_list_count):

    # Don't plot a mutant by itself if it's in the top 5
    label_strip = y_labels[t].replace("\n", "")
    label_strip = label_strip[1:]
    if label_strip in plotted_mutant_labels:
        continue
    x_list_std_devBars[:] = x_list[t][0] + 0.032872
    plt.scatter(x_list[t], y_list[t], marker=path, s=size, color=marker_color_list[t])
    plt.scatter(x_list[t][0] - 0.07754, np.mean(y_list[t]), marker=path_ave, s=size_ave, color='r')
    plt.scatter(x_list_std_devBars, y_list_std_dev[t], marker=path, s=size / 3, color='0.4')
    plt.plot([x_list_std_devBars[0] + 0.044672, x_list_std_devBars[1] + 0.044672],

```

```

        [y_list_std_dev[t][0], y_list_std_dev[t][1]], color='0.4')

# Set background
img = imread(
    "C:\\some directory\\image.png")
plt.imshow(img, extent=[2, 5.5, 2, 5.5])

# Label axes
plt.xlabel('Contact Atoms', fontsize=14, fontname="arial", fontweight="bold")
plt.xticks(x_axis_tick_num, y_labels, fontsize=12, fontname="arial")
plt.ylabel('Distance (Å)', fontsize=14, fontname="arial", fontweight="bold")
plt.yticks(y_ticks, fontsize=12, fontname="arial")

# Set the bottom of the graph to be slightly higher so the x-axis label doesn't get cutoff
plt.gcf().subplots_adjust(bottom=0.15)
plt.show()

# Check for uniformity in the aoi's
uniform = all(x == aoi_list[0] for x in aoi_list)
if not uniform:
    if "O2" in aoi_list:
        aoi = "O2"
    elif "O5" in aoi_list:
        aoi = "O5"
    elif "OP1" or "OP2" in aoi_list:
        op1_count = 0
        op2_count = 0
        for NBO in aoi_list:
            if NBO == "OP1":
                op1_count += 1
            if NBO == "OP2":
                op2_count += 1
        if op1_count > op2_count:
            aoi = "OP1"
        else:
            aoi = "OP2"
    else:
        aoi = "Unidentified aoi"
        print(aoi_list)
else:
    aoi = aoi_list[0]

# Change directory to figures/graphs to change the save location
init_cwd = os.getcwd()
os.chdir(
    "C:\\some directory\\" + aoi)

```

```

plt.savefig(rbz_name + ' ' + aoi + " Contacts" + ".pdf")
plt.savefig(rbz_name + ' ' + aoi + " Contacts" + ".png", dpi=200)
plt.clf()
plt.close()
os.chdir(init_cwd)

# rbz_list is a list of all the ribozymes that we want to collect data on
rbz_list = ["glmS", "Hammerhead", "Hairpin", "Twister", "Pistol", "VS"]
default_dir = "C:\\some directory"

for rbz in rbz_list:
    txt_to_graph(default_dir + '\\' + rbz + '\\' + "NBO" + '\\' + "OP1")
    txt_to_graph(default_dir + '\\' + rbz + '\\' + "NBO" + '\\' + "OP2")
    txt_to_graph(default_dir + '\\' + rbz + '\\' + "O5'")
    if rbz == "Twister Sister":
        continue
    txt_to_graph(default_dir + '\\' + rbz + '\\' + "O2'")

print("DONE" + '\n')

```

## V. All Phosphate Downstream Processing Script

```
# -*- coding: utf-8 -*-
# This script calculate stats on the crystal structures
import os
import numpy as np
import matplotlib.pyplot as plt
import matplotlib as mpl
import sys

mpl.rc('font', family='arial')

def find_sum(contact_list):
    hbond_sum = np.zeros(5)

    for n in contact_list:
        for z in range(5):
            if n == z or n >= z == 4:
                hbond_sum[z] += 1

    return hbond_sum

def find_neighbor(resn, direction, pdb):
    # This function accepts a residue (Ex: 'G33') as an argument and will return its
    # residue number ('33') as the output

    neighbor = ""
    numbers = ['-1', '0', '1', '2', '3', '4', '5', '6', '7', '8', '9']
    # Some hairpin residue numbers have letters in them, such as those found in 3G8S
    resi_letters = "ABCDEFGHJKLM"
    last_letter = -1

    for n in range(len(resn) - 2, -1, -1):
        # Bypasses residue numbers that end with a letter
        if resn[n] not in numbers:
            last_letter = n
            break
    if last_letter == -1:
        sys.exit("An error occurred in the find_neighbor method for " + resn)

    resi = resn[(last_letter + 1):]

    if resi[-1] not in numbers:
        if resi[-1] == 'A' and direction == 'minus':
```

```

    neighbor = str(int(resi[:-1]) - 1)
elif resi[-1] == 'L' and direction == 'plus':
    neighbor = str(int(resi[:-1]) + 1)
else:
    for x in range(len(resi_letters)):
        if resi[-1] == resi_letters[x]:
            if direction == 'minus':
                neighbor = resi[:-1] + resi_letters[x - 1]
            if direction == 'plus':
                neighbor = resi[:-1] + resi_letters[x + 1]
elif direction == 'minus':
    neighbor = str(int(resi) - 1)
elif direction == 'plus':
    neighbor = str(int(resi) + 1)

# This is a list of PDBID's which skips residue 0
pdb__exception__list = ['3B4A', '3B4B', '3B4C', '2Z75', '2Z74', '2H0S', '4G6P', '3GS1', '3I2Q',
'3I2S', '2OUE']

if pdb in pdb__exception__list and neighbor == "0":
    if direction == 'minus':
        neighbor = "-1"
    else:
        neighbor = "1"

return neighbor

def nbo_contact(split, splitStart, step_num, scissile, dist_thresh, pdb):

    exclude_list = ["C1", "C2", "C3", "O3", "O4", "C4", "C5", "O5", "P", "OP1", "OP2", "H",
"C", "O"]
    include_list = ["CA", "CO"]
    # This array holds the chains of interest for crystal structures that contain multiple copies of
the ribozyme
    # and/or one or more polypeptides
    copies_list = [['3G8S', 'EP'], ['3G8T', 'EP'], ['3L3C', 'EP'], ['3G96', 'EP'], ['2NZ4', 'FQ'],
['2QUS', 'A'],
    ['4RGE', 'A'], ['4RGF', 'A'], ['4QJH', 'AB'], ['1M5K', 'AB'], ['1M5O', 'AB'], ['5KTJ',
'AB']]
    ns_cont_list = []
    s_count_1 = 0
    s_count_2 = 0
    s_count = 0
    current_aoi = ""
    nbo_num = "OP1"

```

```

if scissile:
    for n in range(splitStart, len(split), step_num):
        if n == splitStart:
            nbo_num = split[n + 1]
            if '1' in split[n + 1]:
                partner = split[n + 1].replace('1', '2')
            else:
                partner = split[n + 1].replace('2', '1')
            # do not consider atoms that belong to neighboring ribozyme copies or polypeptides to be
contact
            # atoms
            chain_of_interest = True
            for j in range(len(copies_list)):
                if pdb == copies_list[j][0] and split[n + 5] not in copies_list[j][1]:
                    chain_of_interest = False
            minus_1_base = find_neighbor(split[n], 'minus', pdb)
            if split[n + 3] not in exclude_list and dist_thresh > float(split[n + 6]) > 0 and split[n + 4]
!= split[n] \
                and "H" not in split[n + 3] and ("C" not in split[n + 3] or split[n + 3][:2] in
include_list) \
                    and minus_1_base not in split[n + 4] and chain_of_interest:
            if split[n + 1] == nbo_num and s_count_1 < 2:
                s_count_1 += 1
            elif split[n + 1] == partner and s_count_2 < 2:
                s_count_2 += 1

            s_count = s_count_1 + s_count_2

if not scissile:

    first_iteration = True
    aoi_resi_number_from_zero = 0

    for n in range(splitStart, len(split), step_num):
        minus_1_base = find_neighbor(split[n], 'minus', pdb)

        # If this is the first time running the loop/current_aoi is empty
        if not current_aoi or n == splitStart:
            current_aoi = split[n]
            nbo_num = split[n + 1]
            if '1' in split[n + 1]:
                partner = split[n + 1].replace('1', '2')
            else:
                partner = split[n + 1].replace('2', '1')

```



```

# If this is the first time seeing the current aoi
if first_iteration:
    ns_cont_list.append(0)
    first_iteration = False

# If the current aoi lines up with the aoi of the current row, parse it
if nbo_num == split[n + 1]:
    # do not consider atoms that belong to neighboring ribozyme copies or polypeptides to
be contact
    # atoms
    chain_of_interest = True
    for j in range(len(copies_list)):
        if pdb == copies_list[j][0] and split[n + 5] not in copies_list[j][1]:
            chain_of_interest = False
    # Add its data to _cont_list if it's not in exclude list, its distance is eligible and it's not a
    # contact to its own nucleobase
    if split[n + 3] not in exclude_list and dist_thresh > float(split[n + 6]) > 0 and split[n +
4] != \
        split[n] and "2" not in split[n + 1] and "H" not in split[n + 3] and ("C" not in
split[n + 3] or
        split[n + 3][:2] in include_list) and minus_1_base not in split[n + 4] and
chain_of_interest:
        if ns_cont_list[int(aoi_resi_number_from_zero)] < 2:
            ns_cont_list[aoi_resi_number_from_zero] += 1

if n + step_num >= len(split):
    # Pinch off list of data
    ns_cont_list = ns_cont_list[:-1]
    break

if split[n + step_num] != current_aoi and nbo_num == split[n + 1]:
    # Each aoi can have a max of 2 contacts
    first_iter = True
    initial = 2
    # Search for the other NBO
    for x in range(splitStart, len(split), step_num):
        if partner == split[x + 1] and current_aoi == split[x]:
            # Do not consider atoms that belong to neighboring ribozyme copies or
polypeptides to be contact
            # atoms
            chain_of_interest = True
            for j in range(len(copies_list)):
                if pdb == copies_list[j][0] and split[n + 5] not in copies_list[j][1]:
                    chain_of_interest = False
            if split[x + 3] not in exclude_list and dist_thresh > float(split[x + 6]) > 0 \
                and split[x + 4] != split[x] and "H" not in split[x + 3] and (

```

```

        "C" not in split[x + 3] or split[x + 3][:2] in include_list) and minus_1_base
not in \
        split[x + 4] and chain_of_interest:
# Go find the correct resn in resn list
        if first_iter and ns_cont_list[int(aoi_resi_number_from_zero)] > 2:
            sys.exit("There are more than 2 OP1 contacts before OP2 contacts were
added.")

        if first_iter:
            initial = ns_cont_list[aoi_resi_number_from_zero]
            first_iter = False
        if ns_cont_list[int(aoi_resi_number_from_zero)] < 2 + initial:
            ns_cont_list[aoi_resi_number_from_zero] += 1

        aoi_resi_number_from_zero += 1
        ns_cont_list.append(0)

        current_aoi = split[n + step_num]

if s_count > 4:
    sys.exit("There are more than 4 contacts to the NBOs.")
for n in range(len(ns_cont_list)):
    if ns_cont_list[n] > 4:
        sys.exit("There are more than 4 contacts to the NBOs.")
return s_count, ns_cont_list

def sort_data(new_dir, aoi):
    os.chdir(new_dir)
    splitStart = 13
    step_num = 7
    non_cat_list = ["1MME", "299D", "300D", "301D", "359D", "4QJD", "1NYI", "1HMH"]
    exclude_list = ["C1", "C2", "C3", "O3", "O4", "C4", "C5", "O5", "P", "OP1", "OP2", "H",
"C", "O"]
    include_list = ['CA', 'CO']
    # This array holds the chains of interest for crystal structures that contain multiple copies of
the ribozyme
    # and/or one or more polypeptides
    copies_list = [['3G8S', 'EP'], ['3G8T', 'EP'], ['3L3C', 'EP'], ['3G96', 'EP'], ['2NZ4', 'FQ'],
['2QUS', 'A'],
        ['4RGE', 'A'], ['4RGF', 'A'], ['4QJH', 'AB'], ['1M5K', 'AB'], ['1M5O', 'AB'], ['5KTJ',
'AB']]
    ns_list = []
    dist_thresh = 5.0
    s_list = []

    for file_name in os.listdir(os.getcwd()):

```

```

# If file_name isn't one of the text files with data, skip it (continue)
pdb = file_name[:4]
pdb = pdb.upper()
if file_name == "Search.txt" or ".txt" not in file_name or pdb in non_cat_list:
    continue

with open(file_name) as File:
    raw = File.read()
    split = raw.split()

    if "Non-Scissile" in file_name:
        scissile = False
    else:
        scissile = True

    # This loop serves to iterate through contacts in file_name
    current_contact = ""
    s_count = 0
    ns_count = 0
    if aoi[0] == "NBO":
        scis, non_scis = nbo_contact(split, splitStart, step_num, scissile, dist_thresh, pdb)
        if scissile:
            s_list.append(scis)
        else:
            for x in non_scis:
                ns_list.append(x)

    else:
        for n in range(splitStart, len(split), step_num):
            # If this is the first time running the loop/current_contact is empty
            if not current_contact or n == splitStart:
                current_contact = split[n]
            if aoi[0] == "O5":
                adjacent_nb = find_neighbor(split[n], 'minus', pdb)
            else:
                adjacent_nb = find_neighbor(split[n], 'plus', pdb)

            if split[n] == current_contact:
                # Do not consider atoms that belong to neighboring ribozyme copies or
                polypeptides to be contact
                # atoms
                chain_of_interest = True
                for j in range(len(copies_list)):
                    if pdb == copies_list[j][0] and split[n + 5] not in copies_list[j][1]:
                        chain_of_interest = False
                # Add its data to a list

```

```

        if split[n + 3] not in exclude_list and dist_thresh > float(split[n + 6]) > 0 and split[
            n + 4] != split[n] and "H" not in split[n + 3] and (
                "C" not in split[n + 3] or split[n + 3][:2] in include_list) and adjacent_nb not
in \
        split[n + 4] and chain_of_interest:
        if scissile:
            s_count += 1
        elif not scissile:
            ns_count += 1

    if n + step_num >= len(split):
        # Pinch off list of data
        if not scissile:
            ns_list.append(ns_count)
            break
    elif split[n + step_num] != current_contact:
        # Pinch off list of data
        if not scissile:
            ns_list.append(ns_count)
            ns_count = 0
            current_contact = split[n + step_num]

    if scissile:
        s_list.append(s_count)

non_scissile_sum = find_sum(ns_list)
scissile_sum = find_sum(s_list)

# Normalize data
s_out = scissile_sum
ns_out = non_scissile_sum
scissile_sum = [x * 100.0 / np.sum(scissile_sum) for x in scissile_sum]
non_scissile_sum = [x * 100.0 / np.sum(non_scissile_sum) for x in non_scissile_sum]
return non_scissile_sum, scissile_sum, s_list, ns_list, s_out, ns_out

default_dir = "C:\\Directory"
aoi = ["NBO"]
rbz_list = ["glmS", "Hammerhead", "Twister", "Hairpin"]
scissile_data, non_scissile_data, all_scis, all_non_scis = [], [], [], []
init_cwd = os.getcwd()
os.chdir("C:\\Directory")
for rbz in rbz_list:
    os.chdir(init_cwd)
    nsd, sd, s_total, ns_total, s_out, ns_out = sort_data(default_dir + "\\\" + rbz + "\\\" + aoi[0], aoi)
    os.chdir("C:\\Directory")

```

```

scissile_data.append(sd)
non_scissile_data.append(nsd)
all_scis.append(s_total)
all_non_scis.append(ns_total)

init_cwd = os.getcwd()
os.chdir(init_cwd)

init_cwd = os.getcwd()

# Define variables for graphs and get fig, ax objects
width = 0.2
ind = range(5)
ind = [x - width for x in ind]
y_ticks = np.arange(0, 120, 20)
colors = ["#EC60A3", "#F39940", "#008AC9", "#00B79B"]
if "Pistol" in rbz_list:
    colors = ["#783493"]
if "VS" in rbz_list:
    colors = ["#E9302E"]
patch_list = []
fig, ax = plt.subplots()

# Stop autoscaling
ax.autoscale(True, axis='x')
ax.autoscale(False, axis='y')
t = 0

print(scissile_data)
shift = [[0] * 5 for x in range(4)]
# Shift x-values to account for bars with zero height
scissile = True
if scissile:
    for c in range(len(scissile_data[0])):
        zero_count = 0
        for x in range(len(scissile_data)):
            if scissile_data[x][c] == 0:
                zero_count -= 1
            else:
                shift[x][c] = zero_count * width
else:
    for c in range(len(non_scissile_data[0])):
        zero_count = 0
        for x in range(len(non_scissile_data)):
            if non_scissile_data[x][c] == 0:
                zero_count -= 1

```

```

        else:
            shift[x][c] = zero_count * width

# Plot all data
for x in range(len(rbz_list)):
    ind = [c + width for c in ind]
    # Account for zero height bars
    ind2 = [t + c for t, c in zip(ind, shift[x])]
    if not scissile:
        non_scissile_bar = ax.bar(ind2, non_scissile_data[x], width, color='none', label=rbz_list[x],
                                   edgecolor=colors[x],
                                   linewidth=2.2)
    else:
        scissile_bar = ax.bar(ind2, scissile_data[x], width, color=colors[x], label=rbz_list[x])

# Create a legend
plt.legend(frameon=False, fontsize=12)

# Get rid of x-axis ticks but not labels
plt.tick_params(
    axis='x',
    which='both',
    bottom='off',
    top='off',
    labelbottom='on'
)

plt.yticks(y_ticks, fontsize=14)
plt.xticks(range(5), fontsize=14)
ax.set_ylabel("Percentage of " + aoi[0] + "s", fontsize=14)
ax.set_xlabel("Number of Contacts", fontsize=14)
os.chdir(
    "C:\\Directory")
if scissile:
    plt.savefig("Scissile " + aoi[0] + ".pdf")
else:
    plt.savefig("Non-Scissile " + aoi[0] + ".pdf")
plt.show()

print("DONE")

```
